# Supplementary material for: An efficient method for the preparation of tert-butyl esters from benzyl cyanide and tert-butyl hydroperoxide under the metal free condition
Source: Royal Society of Chemistry journal article supplement (doi:10.1039/c6ra20966a), 2016-01-01

# Supporting Information

## **An efficient method for the preparation of *tert*-butyl esters from benzyl cyanide and *tert*-butyl hydroperoxide under the metal free condition**

Xiuling Chen, Yan Li, Minghu Wu,\* haibing Guo, longqiang Jiang, jian Wang, Shaofa Sun\*

Non-power Nuclear Technology Collaborative Innovation Center, School of Nuclear Technology and Chemistry & Life Science, Hubei University of Science and Technology, Xianning 437100 (China)

### Contents

|                                                                                       |             |
|---------------------------------------------------------------------------------------|-------------|
| General remarks                                                                       | <b>2</b>    |
| General procedure                                                                     | <b>2</b>    |
| Optimization of reaction condition<br>Effect of catalyst loading<br>Effect of solvent | <b>2</b>    |
| <sup>1</sup> H and <sup>13</sup> C NMR data of products                               | <b>3</b>    |
| References                                                                            | <b>6</b>    |
| Copies of <sup>1</sup> H and <sup>13</sup> C NMR spectra                              | <b>7-27</b> |

## 1. General remarks

All non-aqueous reactions and manipulations were performed in air atmosphere using standard Schlenk techniques. All solvents before use were dried, degassed by standard methods, and stored under nitrogen. The reactions were monitored by GC and GC-MS. The  $^1\text{H}$  NMR and  $^{13}\text{C}$  NMR spectra were recorded on a Varian INOVA-400 spectrometer at 400 MHz and 100 MHz respectively (Hunan university), and chemical shifts were reported in parts per million (ppm) downfield from TMS using the solvent resonance as internal standard. Flash column chromatography was performed using silica gel 30-60  $\mu\text{m}$ . GC-MS results were recorded on GC-MS QP2010, and GC analysis was performed on GC 7820A (Hunan university). The electron ionization (EI) method was used as the ionization method for the HRMS measurement (Thermo Finnigan MAT 95 XP, Hunan University). Melting point was recorded on X-4 (digital display micro melting point measuring instrument, Gonyiyuhua). Benzonitriles were purchased from Energy Chemical, Alfa Aesar, Aladdin or Maya Reagent; 2-phenylacetonitrile was dried and degassed by standard methods and stored under nitrogen before use. The TBHP was purchased from Energy Chemical, dried by  $\text{MgSO}_4$  before use.

## 2. General procedure

5 mol% catalyst, 0.2 mmol benzonitriles, 1.2 mmol TBHP, 110 mg 4Å MS were dissolved in 2 mL  $\text{CH}_3\text{CN}$  under  $\text{N}_2$  atmosphere and stirred at 60  $^\circ\text{C}$  in sealed tube. After completion of the reaction, the resulting solution was cooled to room temperature, washed with saturated  $\text{NaCO}_3$  aqueous solution, and extracted with  $\text{CHCl}_3$  three times. The organic layer was dried over anhydrous  $\text{MgSO}_4$ , and concentrated under reduced pressure. The residue was purified by column chromatography on silica gel and eluted with petroleum ether to afford the desired product.

## 3. Optimization of reaction conditions<sup>a</sup>

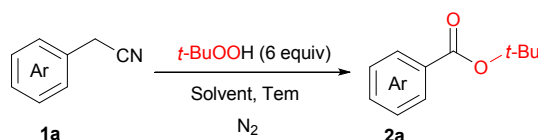

| Entry           | Metal cat. (5 mol %) | Ms 4 Å <sup>b</sup> | Solvent                | Yield ( <b>2a</b> ) <sup>c</sup> |
|-----------------|----------------------|---------------------|------------------------|----------------------------------|
| 1               | CuCl                 | -                   | acetone                | 34                               |
| 2               | CuCl                 | -                   | DCE                    | 35                               |
| 3               | CuCl                 | -                   | 1,4-dioxane            | 40                               |
| 4               | CuCl                 | -                   | THF                    | 36                               |
| 5               | CuCl                 | -                   | toluene                | 37                               |
| 6               | CuCl                 | -                   | <i>n</i> -hexane       | 39                               |
| 7               | CuCl                 | -                   | DMSO                   | 27                               |
| 8               | CuCl                 | -                   | DMF                    | 35                               |
| 9               | CuCl                 | -                   | $\text{CH}_3\text{CN}$ | 45                               |
| 10              | $\text{MnCl}_2$      | -                   | $\text{CH}_3\text{CN}$ | 41                               |
| 11              | $\text{MnCO}_3$      | -                   | $\text{CH}_3\text{CN}$ | 20                               |
| 12              | $\text{FeCl}_3$      | -                   | $\text{CH}_3\text{CN}$ | 18                               |
| 13              | $\text{AgNO}_3$      | -                   | $\text{CH}_3\text{CN}$ | 41                               |
| 14              | --                   | -                   | $\text{CH}_3\text{CN}$ | 46                               |
| 15              | --                   | +                   | $\text{CH}_3\text{CN}$ | 89                               |
| 16 <sup>d</sup> | --                   | +                   | $\text{CH}_3\text{CN}$ | 86                               |
| 17 <sup>e</sup> | --                   | +                   | $\text{CH}_3\text{CN}$ | 60                               |
| 18 <sup>f</sup> | --                   | +                   | $\text{CH}_3\text{CN}$ | 29                               |
| 19 <sup>g</sup> | --                   | +                   | $\text{CH}_3\text{CN}$ | --                               |

<sup>a</sup>Reaction conditions: 2-phenylacetonitrile **1a** (0.2 mmol), TBHP (1.2 mmol), cat (5 mol%), additive (110 mg), solvent (2 ml), in 25 mL schlenk tube, 60  $^\circ\text{C}$ ,  $\text{N}_2$ , 16 h. <sup>b</sup>Abbreviation: + or - shows the presence or absence of 4A

molecular sieves. <sup>c</sup>GC yields based on **1a** using *n*-hexadecane as internal standard. <sup>d</sup>80 °C. <sup>e</sup>100 °C. <sup>f</sup>40 °C. <sup>g</sup>di-*tert*-butyl peroxide (DTBP) was employed as oxidant under N<sub>2</sub> atmosphere.

## <sup>1</sup>H NMR and <sup>13</sup>C NMR data of products

### *tert*-butyl benzoate (**2a**)<sup>1</sup>

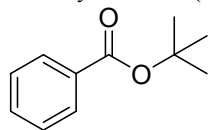

Following the general procedure (petroleum ether), **2a** was obtained as a white liquid, isolated yield: 82%. <sup>1</sup>H NMR (CDCl<sub>3</sub>, 400 MHz): δ 7.98 (d, 2H, *J* = 4.0 Hz), 7.51 (t, 1H, *J* = 7.4 Hz), 7.41 (t, 2H, *J* = 7.6 Hz), 1.60 (s, 9H); <sup>13</sup>C NMR (100 MHz, CDCl<sub>3</sub>): δ 165.8, 132.4, 132.0, 129.4, 128.2, 81.0, 28.2; GC-MS: *m/z* = 178.

### *tert*-butyl 4-methylbenzoate (**2b**)<sup>1</sup>

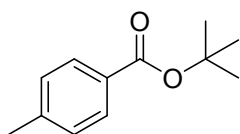

Following the general procedure (petroleum ether), **2b** was obtained as a white liquid, isolated yield: 81%. <sup>1</sup>H NMR (CDCl<sub>3</sub>, 400 MHz): δ 7.76 (d, 2H, *J* = 8.4 Hz), 7.17 (d, 2H, *J* = 8.0 Hz), 2.33 (s, 3H), 1.33 (s, 9H); <sup>13</sup>C NMR (100 MHz, CDCl<sub>3</sub>): δ 164.5, 144.2, 129.3, 129.1, 124.9, 83.9, 26.3, 21.7; GC-MS: *m/z* = 192.

### *tert*-butyl 4-methoxybenzoate (**2c**)<sup>1</sup>

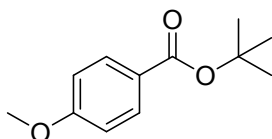

Following the general procedure (petroleum ether), **2c** was obtained as a white liquid, isolated yield: 82%. <sup>1</sup>H NMR (CDCl<sub>3</sub>, 400 MHz): δ 7.93 (d, 2H, *J* = 8.8 Hz), 6.88 (d, 2H, *J* = 8.8 Hz), 3.84 (s, 3H), 1.58 (s, 9H); <sup>13</sup>C NMR (100 MHz, CDCl<sub>3</sub>): δ 165.6, 163.0, 131.4, 124.5, 113.4, 80.5, 55.4, 28.3; GC-MS: *m/z* = 208.

### *tert*-butyl 4-hydroxybenzoate (**2d**)<sup>2</sup>

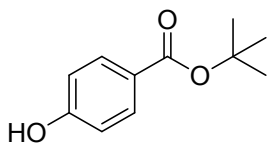

Following the general procedure (petroleum ether), **2d** was obtained as a white solid, mp = 128-130 °C isolated yield: 72%. <sup>1</sup>H NMR (CDCl<sub>3</sub>, 400 MHz): δ 7.88 (d, 2H, *J* = 8.8 Hz), 6.85 (d, 2H, *J* = 8.8 Hz), 1.59 (s, 9H); <sup>13</sup>C NMR (100 MHz, CDCl<sub>3</sub>): δ 165.6, 166.3, 160.1, 131.7, 124.0, 115.1, 81.0, 28.3; GC-MS: *m/z* = 194.

### *tert*-butyl 4-fluorobenzoate (**2e**)<sup>3</sup>

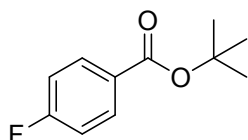

Following the general procedure (petroleum ether), **2e** was obtained as a pale yellow liquid, isolated yield: 81%. <sup>1</sup>H NMR (CDCl<sub>3</sub>, 400 MHz): δ 7.98 (d, 2H, *J* = 4.4 Hz), 7.07 (d, 2H, *J* = 8.6 Hz), 1.59 (s, 9H); <sup>13</sup>C NMR (100 MHz, CDCl<sub>3</sub>): δ 164.5 (d, *J*<sub>F-C</sub> = 251.3 Hz), 163.8, 130.8 (d, *J*<sub>F-C</sub> = 9.2 Hz), 127.2 (d, *J*<sub>F-C</sub> = 2.9 Hz), 114.1 (d, *J*<sub>F-C</sub> = 21.7 Hz), 80.2, 27.2; <sup>19</sup>F NMR (376 MHz, CDCl<sub>3</sub>): δ -106.9 (s, 1F); GC-MS: *m/z* = 196.

*tert*-butyl 4-chlorobenzoate (**2f**)<sup>1</sup>

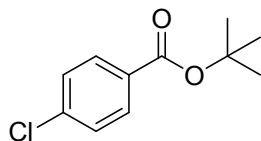

Following the general procedure (petroleum ether), **2f** was obtained as white liquid, isolated yield: 78%. <sup>1</sup>H NMR (CDCl<sub>3</sub>, 400 MHz): δ 7.91 (d, 2H, *J* = 8.4 Hz), 7.36 (d, 2H, *J* = 8.4 Hz), 1.59 (s, 9H); <sup>13</sup>C NMR (100 MHz, CDCl<sub>3</sub>): δ 164.8, 138.8, 130.8, 130.4, 128.4, 81.4, 28.1; GC-MS: *m/z* = 212.

*tert*-butyl 4-bromobenzoate (**2g**)<sup>1</sup>

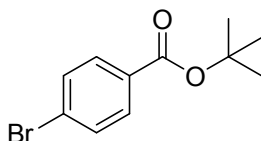

Following the general procedure (petroleum ether), **2g** was obtained as a pale yellow liquid, isolated yield: 83%. <sup>1</sup>H NMR (CDCl<sub>3</sub>, 400 MHz): δ 7.83 (d, 2H, *J* = 8.4 Hz), 7.53 (d, 2H, *J* = 8.4 Hz), 1.58 (s, 9H); <sup>13</sup>C NMR (100 MHz, CDCl<sub>3</sub>): δ 165.0, 131.5, 131.0, 130.9, 127.4, 81.5, 28.2; GC-MS: *m/z* = 256.

*tert*-butyl 4-iodobenzoate (**2h**)<sup>4</sup>

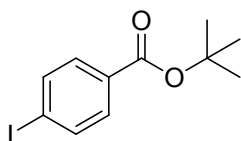

Following the general procedure (petroleum ether), **2h** was obtained as a yellow liquid, isolated yield: 69%. <sup>1</sup>H NMR (CDCl<sub>3</sub>, 400 MHz): δ 7.74 (d, 2H, *J* = 8.4 Hz), 7.67 (d, 2H, *J* = 8.8 Hz), 1.57 (s, 9H); <sup>13</sup>C NMR (100 MHz, CDCl<sub>3</sub>): δ 165.2, 137.5, 131.5, 131.0, 100.1, 81.4, 28.2; GC-MS: *m/z* = 303.

*tert*-butyl 4-(trifluoromethyl)benzoate (**2i**)<sup>5</sup>

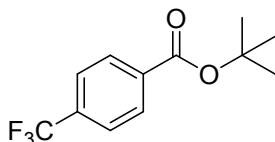

Following the general procedure (petroleum ether), **3a** was obtained as a pale yellow liquid, isolated yield: 78%. <sup>1</sup>H NMR (CDCl<sub>3</sub>, 400 MHz): δ 8.09 (d, 2H, *J* = 8.4 Hz), 7.66 (d, 2H, *J* = 8.4 Hz), 1.60 (s, 9H); <sup>13</sup>C NMR (100 MHz, CDCl<sub>3</sub>): δ 164.5, 135.2, 134.0 (q, *J*<sub>F-C</sub> = 32,3 Hz), 129.8, 125.2 (q, *J*<sub>F-C</sub> = 3.8 Hz), 123.7 (q, *J*<sub>F-C</sub> = 270.9 Hz), 81.9, 28.1; <sup>19</sup>F NMR (376 MHz, CDCl<sub>3</sub>): δ -63.0 (s, 3F); GC-MS: *m/z* = 246.

*tert*-butyl [1,1'-biphenyl]-4-carboxylate (**2j**)<sup>6</sup>

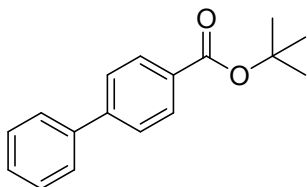

Following the general procedure (petroleum ether), **2j** was obtained as a pale yellow liquid, isolated yield: 73%. <sup>1</sup>H NMR (CDCl<sub>3</sub>, 400 MHz): δ 8.09 (d, 2H, *J* = 8.0 Hz), 7.65 (t, 4H, *J* = 8.4 Hz), 7.47 (t, 2H, *J* = 7.6 Hz), 7.40 (t,

1H,  $J = 7.4$  Hz), 1.65 (s, 9H);  $^{13}\text{C}$  NMR (100 MHz,  $\text{CDCl}_3$ ):  $\delta$  165.7, 145.2, 140.2, 130.8, 130.0, 128.9, 128.0, 127.3, 126.9, 81.0, 28.3; GC-MS:  $m/z = 254$ .

*tert*-butyl 4-nitrobenzoate (**2k**)<sup>3</sup>

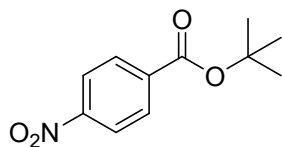

Following the general procedure (petroleum ether), **2k** was obtained as a white solid, mp = 112-114 °C isolated yield: 90%.  $^1\text{H}$  NMR ( $\text{CDCl}_3$ , 400 MHz):  $\delta$  8.23 (d, 2H,  $J = 8.8$  Hz), 8.12 (d, 2H,  $J = 8.8$  Hz), 1.60 (s, 9H);  $^{13}\text{C}$  NMR (100 MHz,  $\text{CDCl}_3$ ):  $\delta$  163.7, 150.2, 137.4, 130.5, 123.3, 82.6, 28.1; HRMS (EI): calcd for  $\text{C}_{11}\text{H}_{13}\text{NO}_4$ : 223.0845; found: 223.0882.

di-*tert*-butyl terephthalate (**2l**)<sup>6</sup>

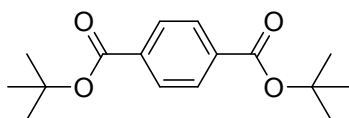

Following the general procedure (petroleum ether), **2l** was obtained as white solid, mp = 117-119 °C, isolated yield: 72%.  $^1\text{H}$  NMR ( $\text{CDCl}_3$ , 400 MHz):  $\delta$  8.00 (s, 4H), 1.60 (s, 9H);  $^{13}\text{C}$  NMR (100 MHz,  $\text{CDCl}_3$ ):  $\delta$  165.1, 135.4, 129.2, 81.6, 28.1; GC-MS:  $m/z = 278$ .

*tert*-butyl thiophene-2-carboxylate (**2m**)<sup>1</sup>

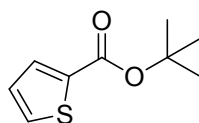

Following the general procedure (petroleum ether), **2m** was obtained as a pale yellow liquid, isolated yield: 72%.  $^1\text{H}$  NMR ( $\text{CDCl}_3$ , 400 MHz):  $\delta$  7.70 (d, 1H,  $J = 3.6$  Hz), 7.48 (d, 1H,  $J = 5.2$  Hz), 7.05 (t, 1H,  $J = 4.2$  Hz), 1.57 (s, 9H);  $^{13}\text{C}$  NMR (100 MHz,  $\text{CDCl}_3$ ):  $\delta$  161.6, 135.9, 132.7, 131.6, 127.5, 81.7, 28.2; GC-MS:  $m/z = 184$ .

*tert*-butyl-1-naphthoate (**2n**)<sup>1</sup>

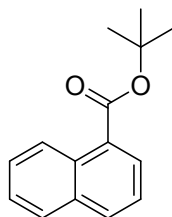

Following the general procedure (petroleum ether), **2n** was obtained as a pale yellow liquid, isolated yield: 80%.  $^1\text{H}$  NMR ( $\text{CDCl}_3$ , 400 MHz):  $\delta$  8.87 (d, 1H,  $J = 8.4$  Hz), 8.09 (d, 1H,  $J = 7.2$  Hz), 7.98 (d, 1H,  $J = 8.0$  Hz), 7.87 (d, 1H,  $J = 8.0$  Hz), 7.60 (t, 1H,  $J = 7.6$  Hz), 7.47-7.54 (m, 2H), 1.69 (s, 9H);  $^{13}\text{C}$  NMR (100 MHz,  $\text{CDCl}_3$ ):  $\delta$  167.2, 133.9, 132.7, 131.2, 129.6, 129.3, 128.5, 127.4, 126.0, 125.8, 124.5, 81.5, 28.4; GC-MS:  $m/z = 228$ .

*tert*-butyl-2-naphthoate (**2o**)<sup>1</sup>

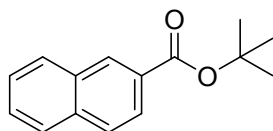

Following the general procedure (petroleum ether), **2o** was obtained as a white solid, mp = 81-83 °C, isolated yield: 84%. <sup>1</sup>H NMR (CDCl<sub>3</sub>, 400 MHz): δ 8.55 (s, 1H), 8.03 (d, 1H, *J* = 8.4 Hz), 7.94 (d, 1H, *J* = 8.0 Hz), 7.86 (d, 2H, *J* = 5.2 Hz), 7.51-7.59 (m, 1H), 1.66 (s, 9H); <sup>13</sup>C NMR (100 MHz, CDCl<sub>3</sub>): δ 166.0, 135.3, 132.5, 130.7, 129.3, 128.0, 127.9, 127.7, 126.5, 125.4, 81.2, 28.3; GC-MS: *m/z* = 228.

*tert*-pentyl 4-methoxybenzoate (**2p**)

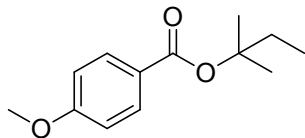

Following the general procedure (petroleum ether), **3a** was obtained as a pale yellow liquid, isolated yield: 82%. <sup>1</sup>H NMR (CDCl<sub>3</sub>, 400 MHz): δ 7.86 (d, 2H, *J* = 8.8 Hz), 7.80 (d, 2H, *J* = 8.2 Hz), 3.75 (s, 3H), 1.82 (q, 2H, *J* = 7.6 Hz), 1.58 (s, 9H), 0.87 (t, 3H, *J* = 7.6 Hz); <sup>13</sup>C NMR (100 MHz, CDCl<sub>3</sub>): δ 165.5, 163.0, 131.3, 124.5, 113.4, 82.9, 55.4, 33.8, 25.7, 8.3; HRMS (EI): calcd for C<sub>13</sub>H<sub>18</sub>O<sub>3</sub>: 222.1256; found: 222.1241.

*tert*-pentyl 4-bromobenzoate (**2q**)

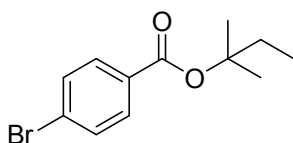

Following the general procedure (petroleum ether), **2q** was obtained as a pale yellow liquid, isolated yield: 88%. isolated yield: 93%. <sup>1</sup>H NMR (CDCl<sub>3</sub>, 400 MHz, TMS): δ 7.83 (d, 2H, *J* = 8.4 Hz), 7.53 (d, 2H, *J* = 8.4 Hz), 1.91 (q, 2H, *J* = 7.4 Hz), 1.55 (s, 9H), 0.95 (t, 3H, *J* = 7.2 Hz); <sup>13</sup>C NMR (100 MHz, CDCl<sub>3</sub>, TMS): δ 164.9, 131.5, 131.0, 130.9, 127.4, 83.9, 33.7, 26.0, 8.3; HRMS (EI): calcd for C<sub>12</sub>H<sub>15</sub>BrO<sub>2</sub>: 270.0255; found: 270.0269.

*tert*-pentyl 4-nitrobenzoate (**2r**)

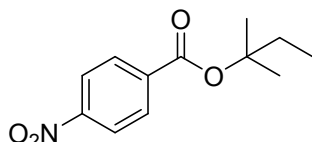

Following the general procedure (petroleum ether), **2r** was obtained as a pale yellow liquid, isolated yield: 83%. <sup>1</sup>H NMR (CDCl<sub>3</sub>, 400 MHz): δ 8.23 (d, 2H, *J* = 8.8 Hz), 8.12 (d, 2H, *J* = 8.8 Hz), 1.93 (q, 2H, *J* = 7.6 Hz), 1.57 (s, 9H), 0.95 (t, 3H, *J* = 7.6 Hz); <sup>13</sup>C NMR (100 MHz, CDCl<sub>3</sub>): δ 163.6, 150.2, 137.4, 130.5, 123.4, 85.1, 33.6, 25.5, 8.3; HRMS (EI): calcd for C<sub>12</sub>H<sub>15</sub>NO<sub>4</sub>: 237.1001; found: 237.1018.

## 4. References

1. S. Pramanik, R. R. Reddy and P. Ghorai, *Org. Lett.*, 2015, **17**, 1393-1396.
2. C. Marculescu, H. Kossen, R. E. Morgan, P. Mayer, S.A. Fletcher, B. Tolner, K. A. Chester, L. H. Jones and J. R. Baker, *Chem. Commun.*, 2014, **50**, 7139-7142.
3. N. Zhang, R. Yang, D. Zhang-Negrerie, Y. Du and K. Zhao, *J. Org. Chem.*, 2013, **78**, 8705-8711.
4. T. C. Wang, W. Bury, D. A. Gómez-Gualdrón, N. A. Vermeulen, J. E. Mondloch, P. Deria, K. Zhang, P. Z. Moghadam, A. A. Sarjeant, R. Q. Snurr, J. F. Stoddart, J. T. Hupp and O. K. Farha, *J. Am. Chem. Soc.*, 2015, **137**, 3585-3591.
5. Z. Xin, T. M. Gøgsig, A. T. Lindhardt and T. Skrydstrup, *Org. Lett.*, 2012, **14**, 84-287.
6. H. Zhang, R. Shi, A. Ding, L. Lu, B. Chen and A. Lei, *Angew. Chem. Int. Ed.*, 2012, **51**, 12542-12545.

## 5. Copies of $^1\text{H}$ , $^{13}\text{C}$ NMR and $^{19}\text{F}$ NMR spectra

### $^1\text{H}$ NMR and $^{13}\text{C}$ NMR of **2a**

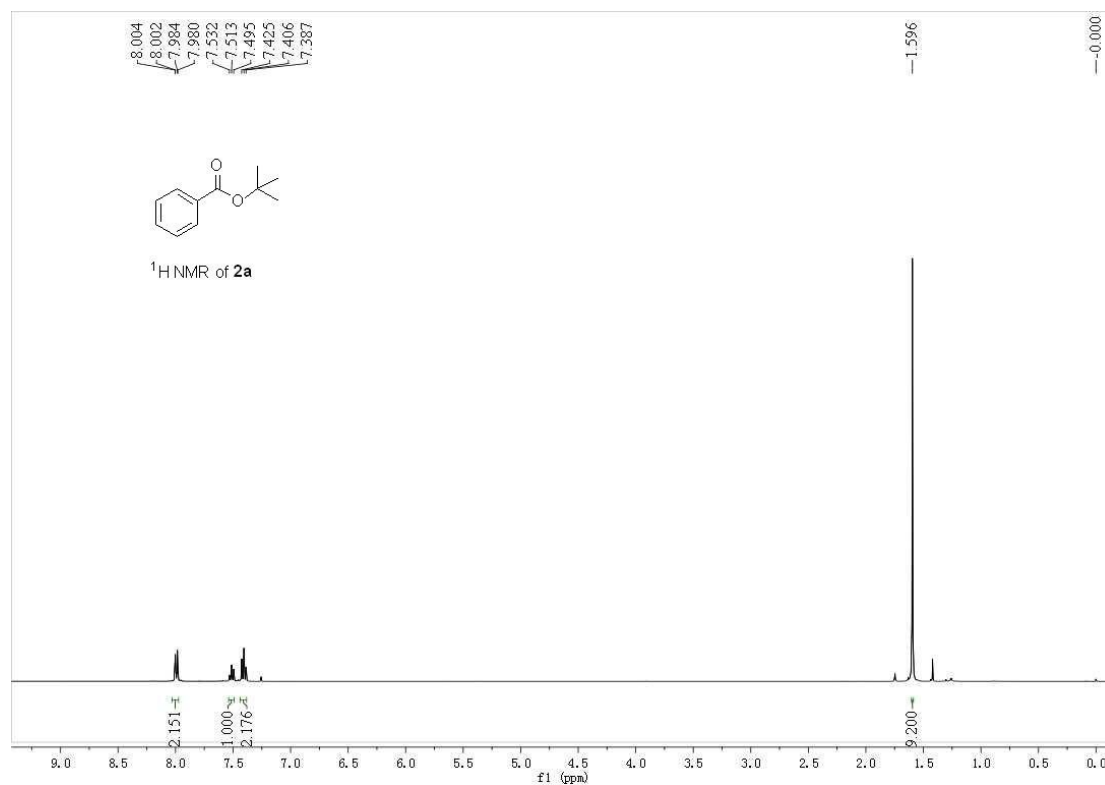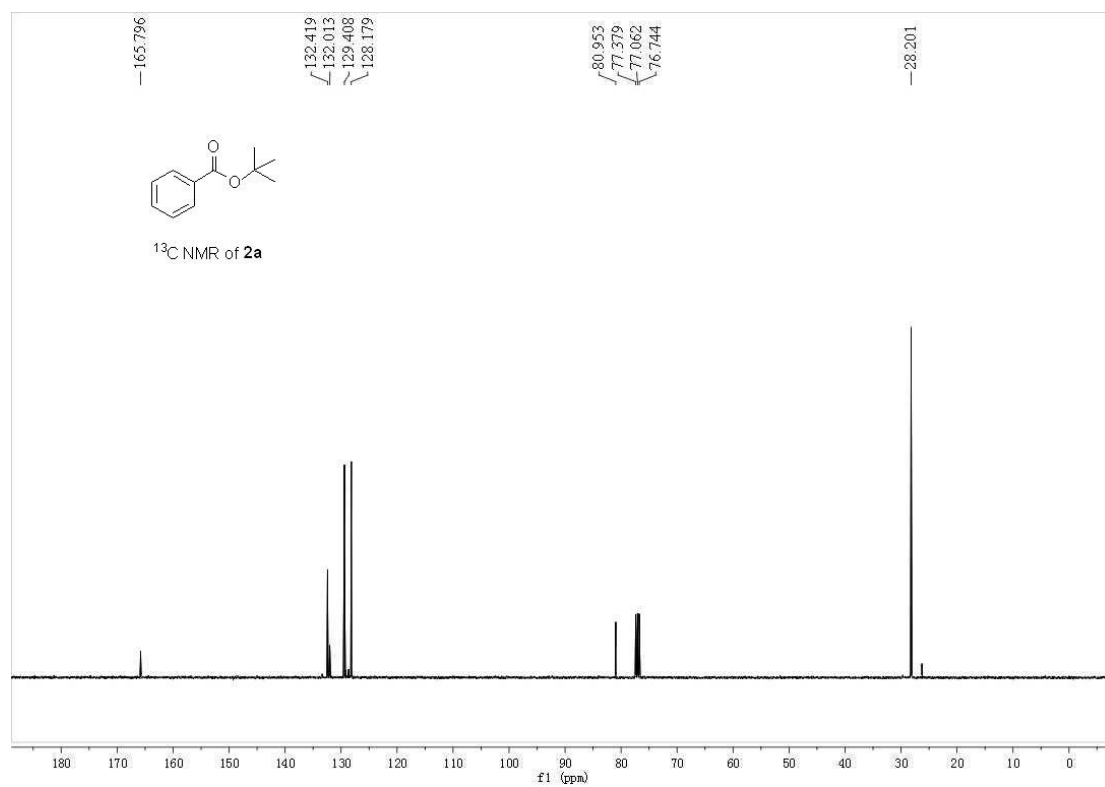

# $^1\text{H}$ NMR and $^{13}\text{C}$ NMR of **2b**

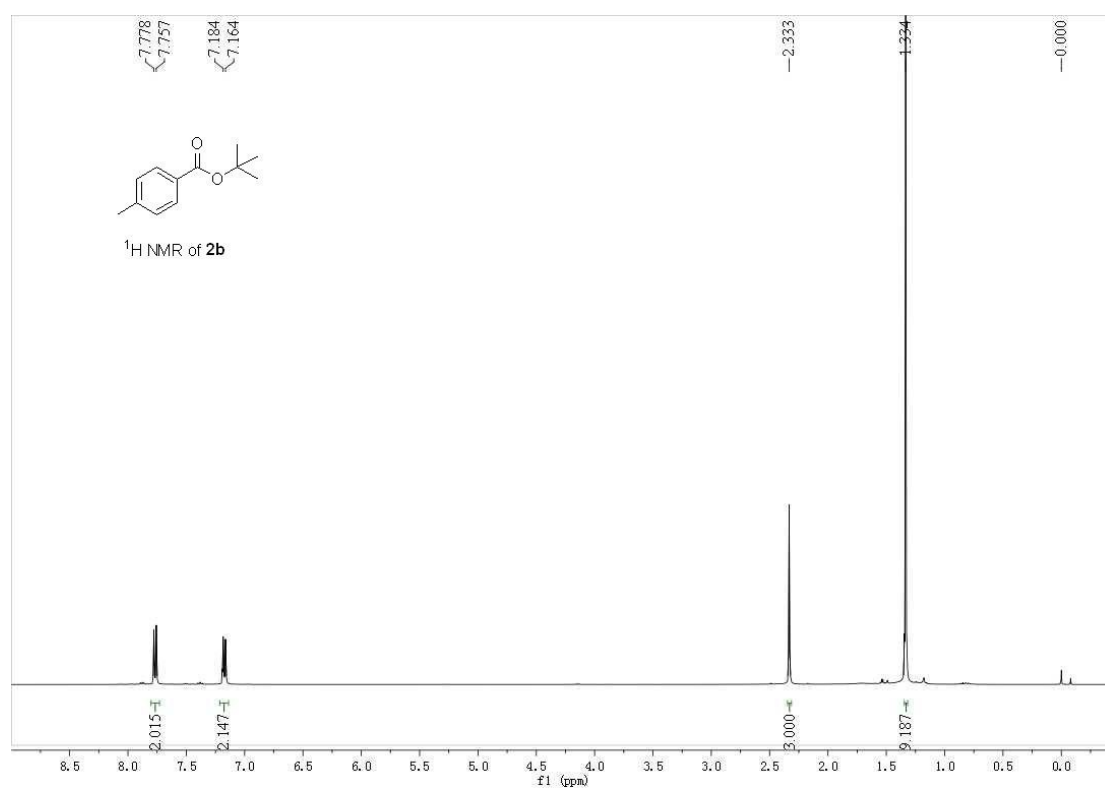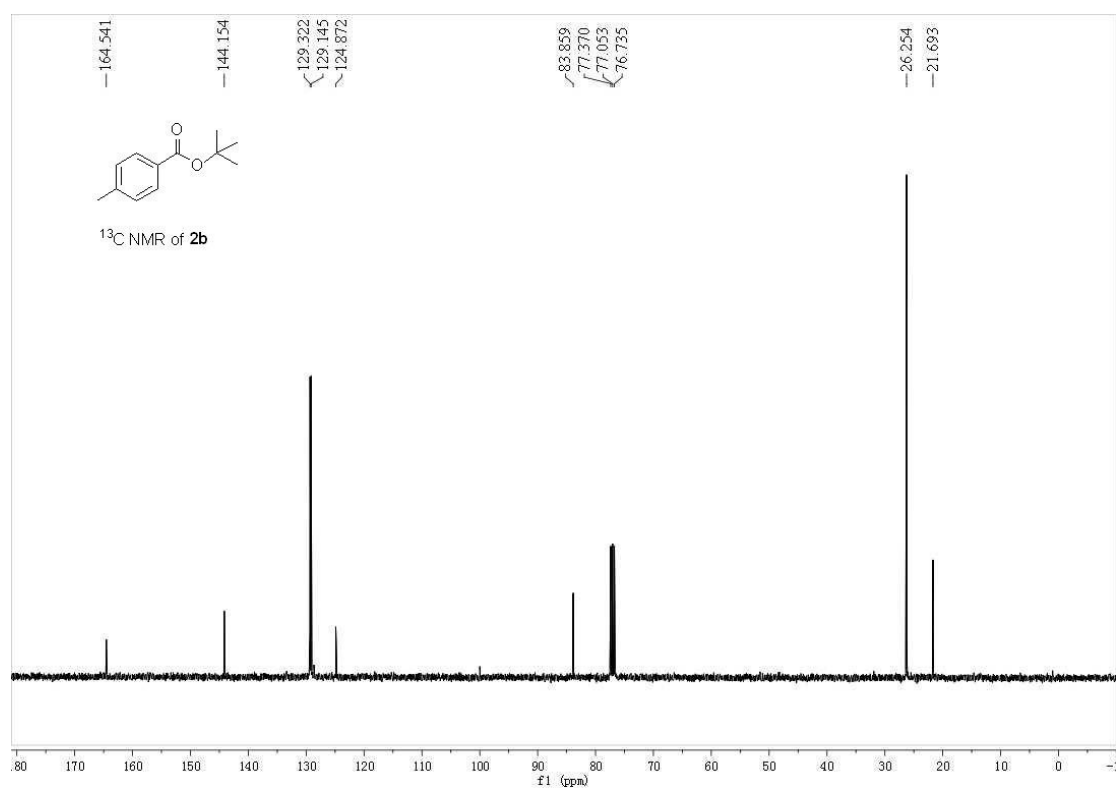



# <sup>1</sup>H NMR and <sup>13</sup>C NMR of 2c

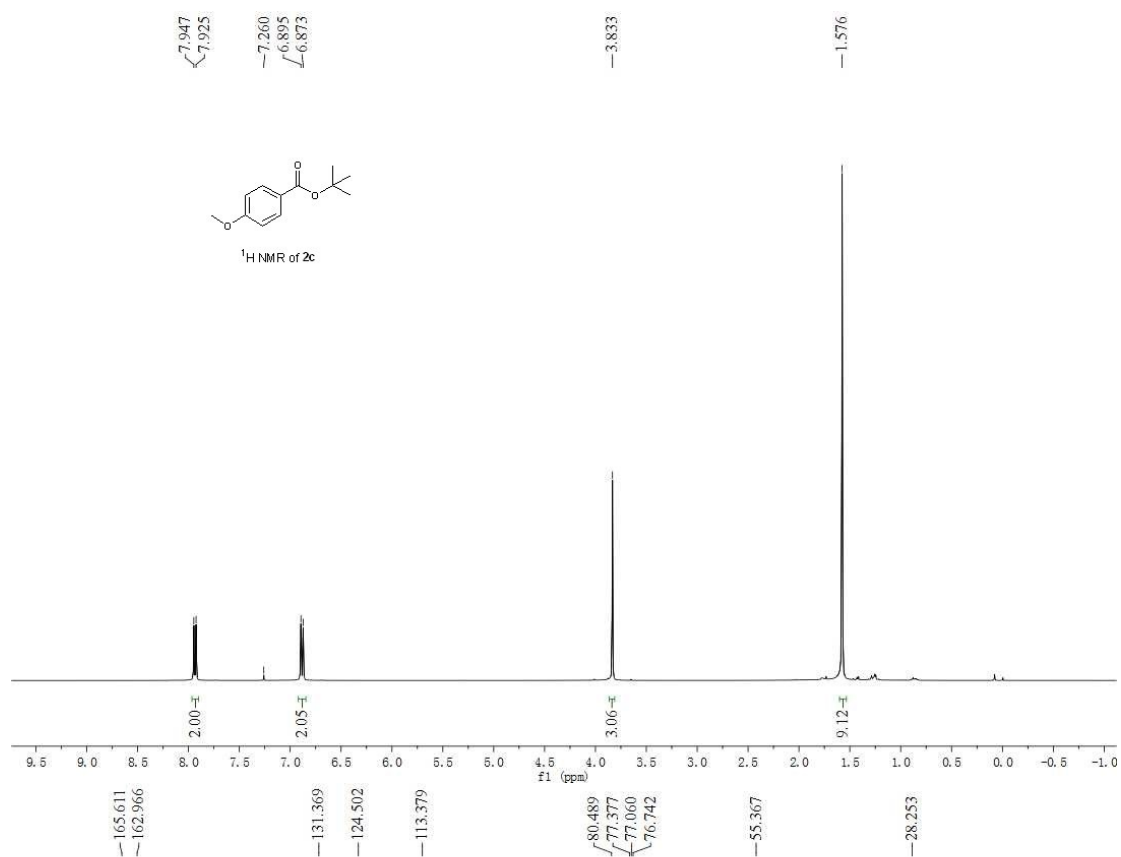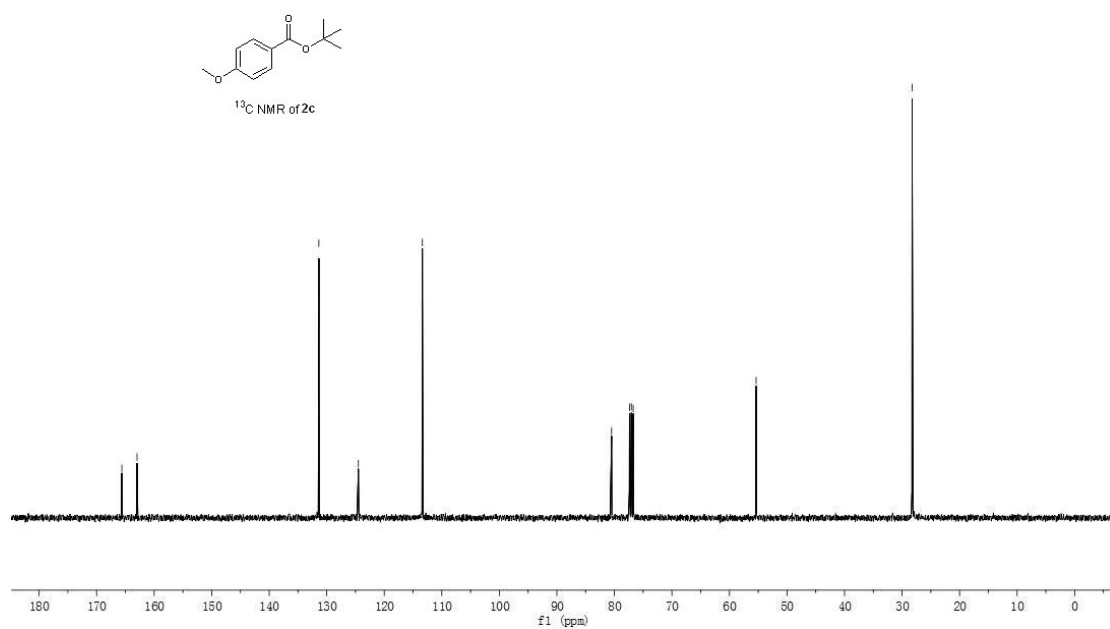

# <sup>1</sup>H NMR and <sup>13</sup>C NMR of 2d

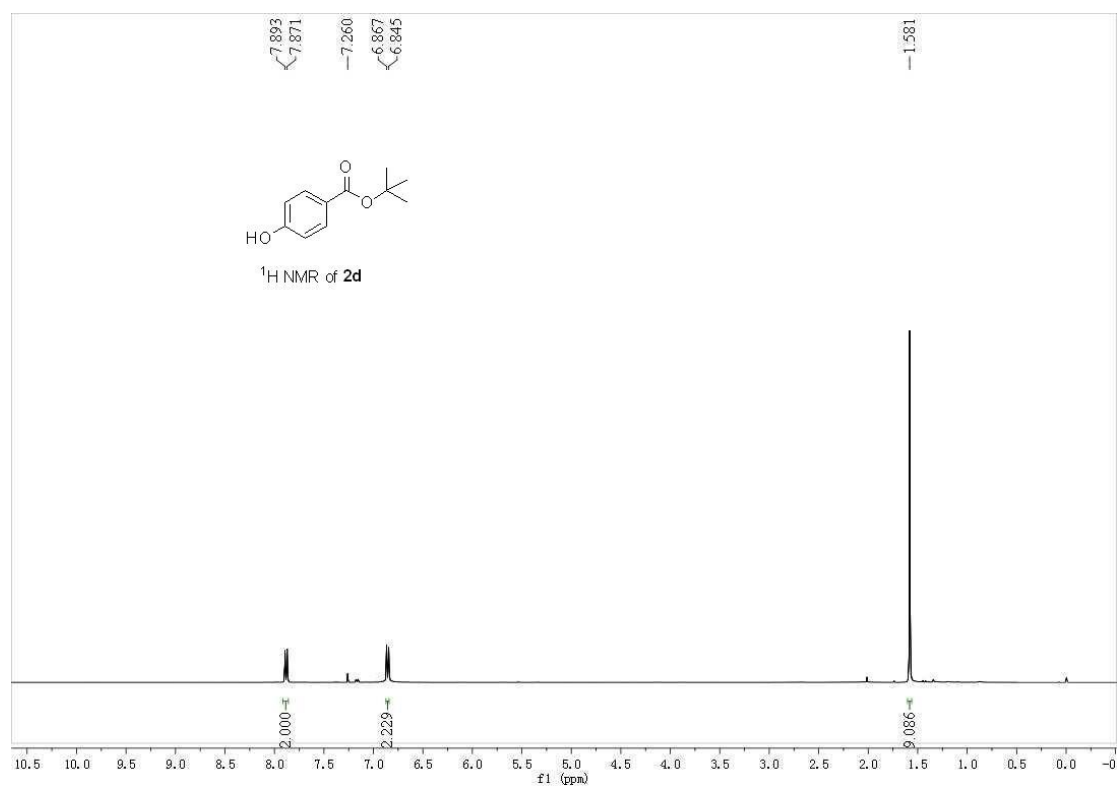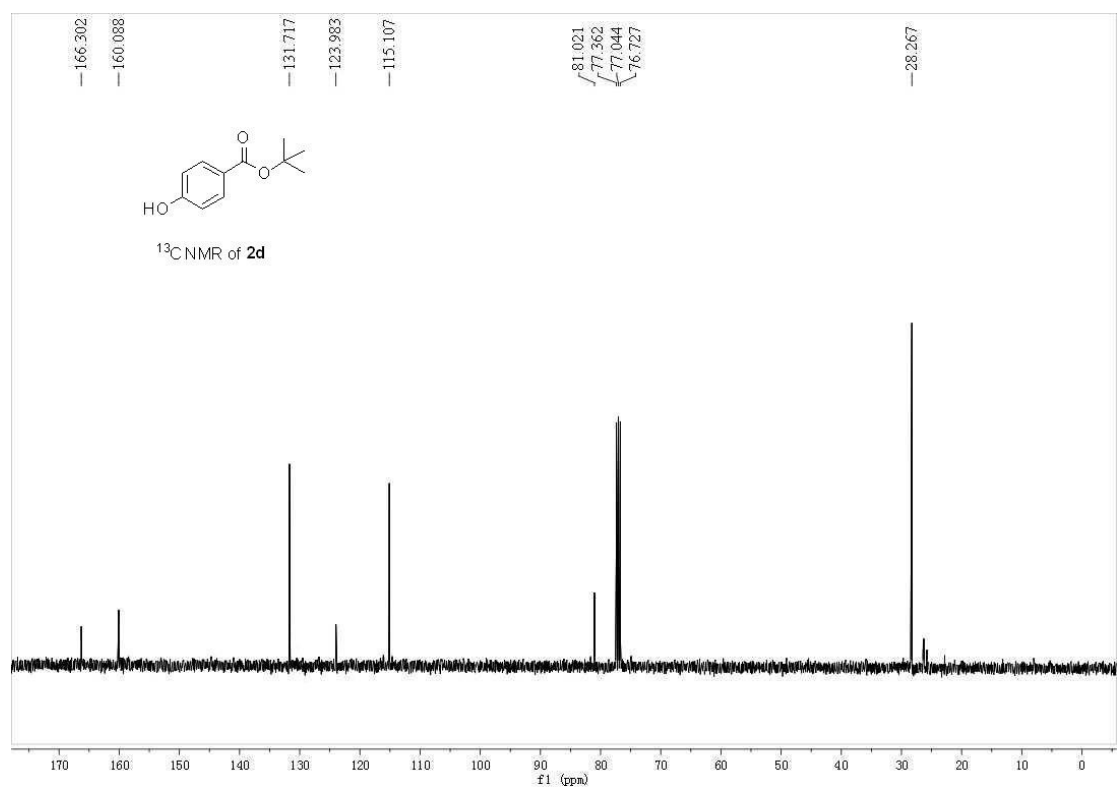

$^1\text{H}$  NMR,  $^{13}\text{C}$  NMR and  $^{19}\text{F}$  NMR of **2e**

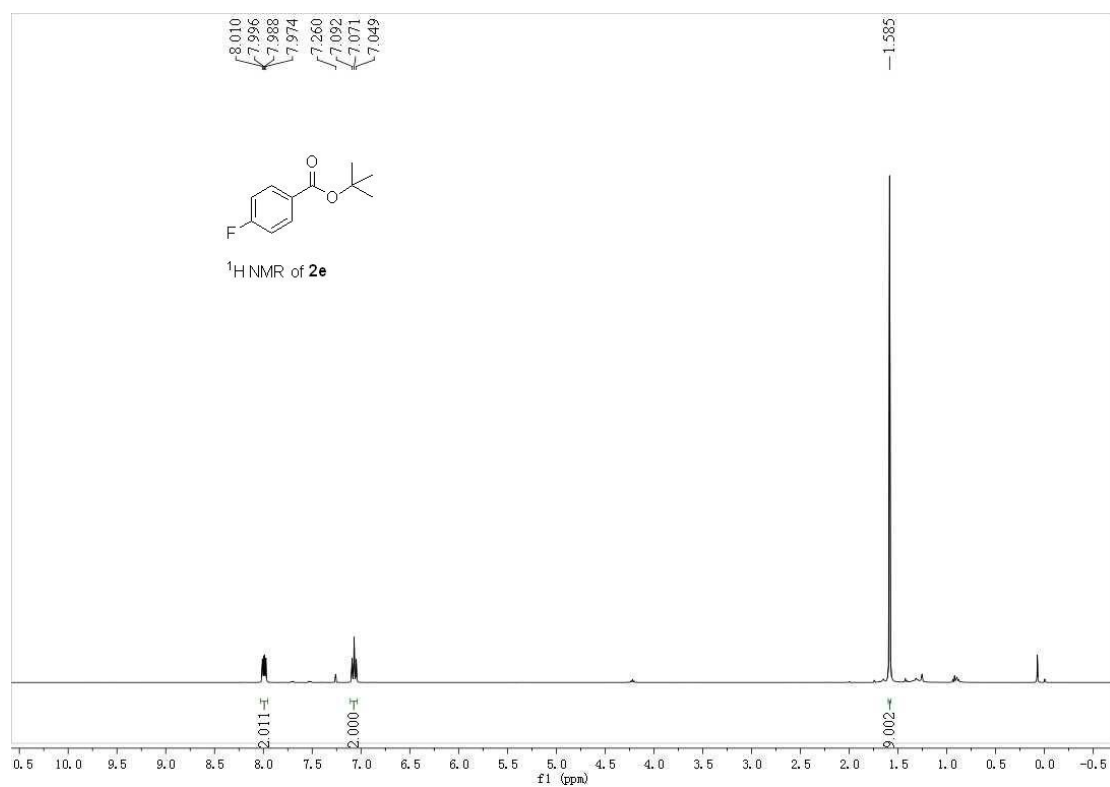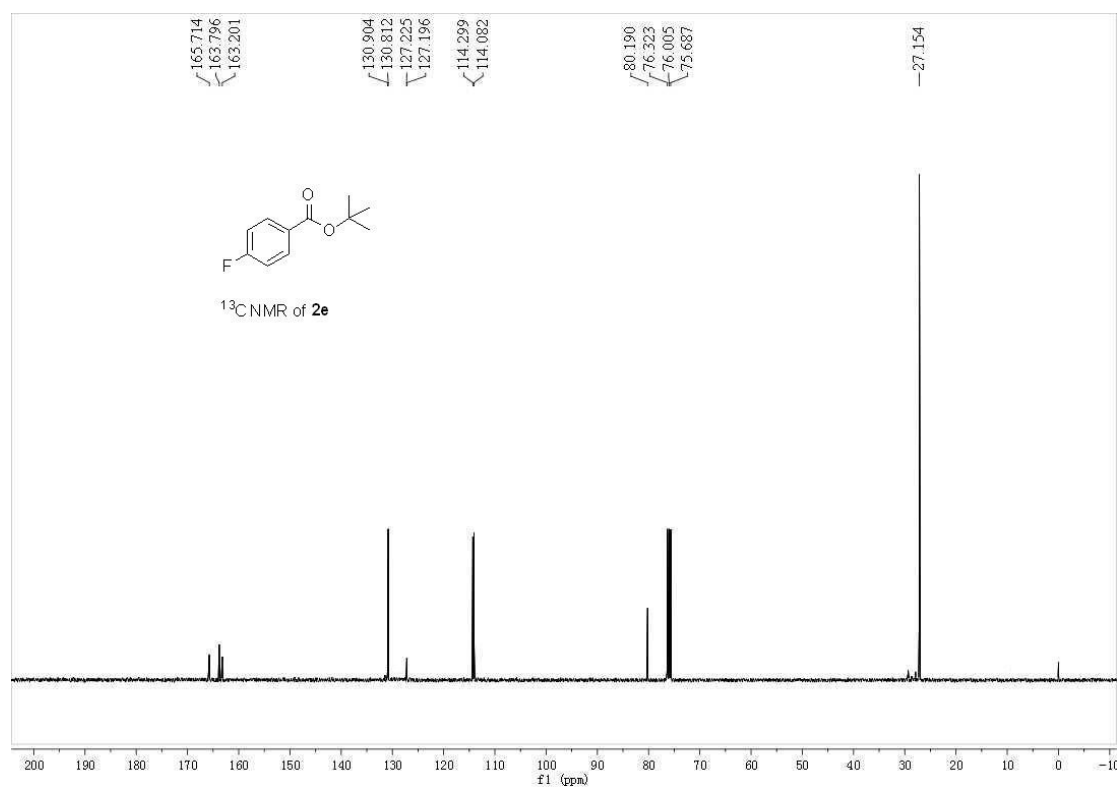

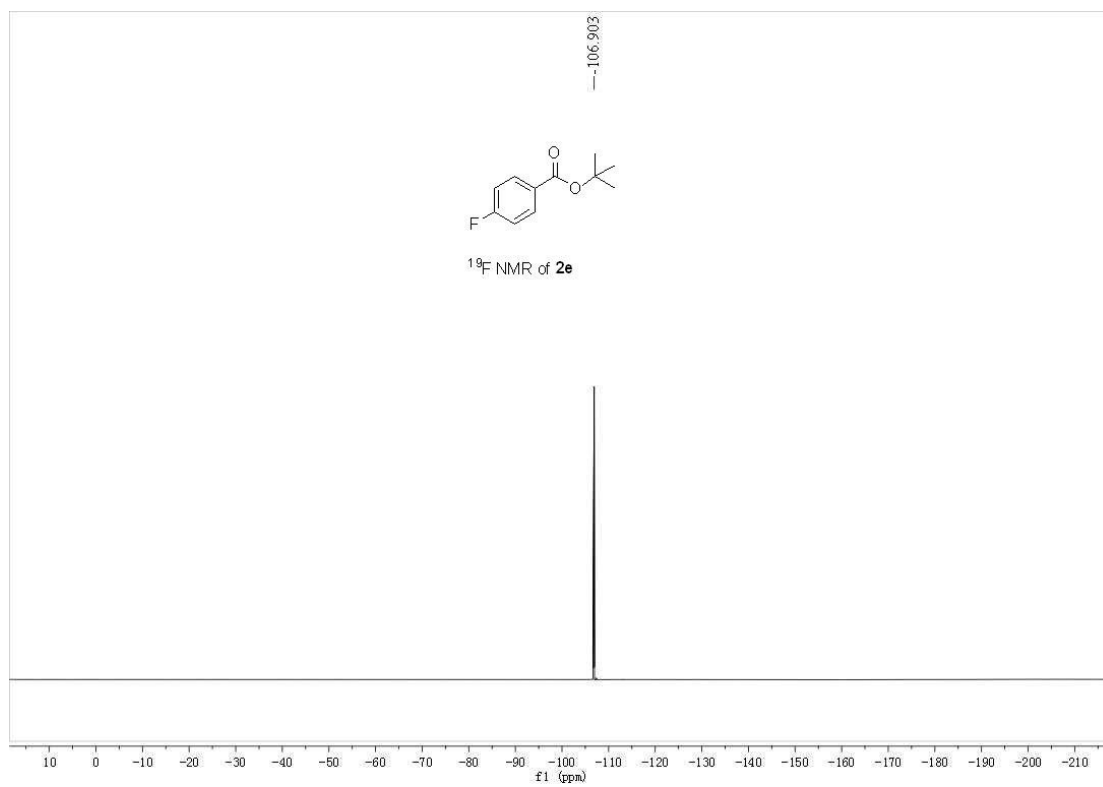

# $^1\text{H}$ NMR and $^{13}\text{C}$ NMR of **2f**

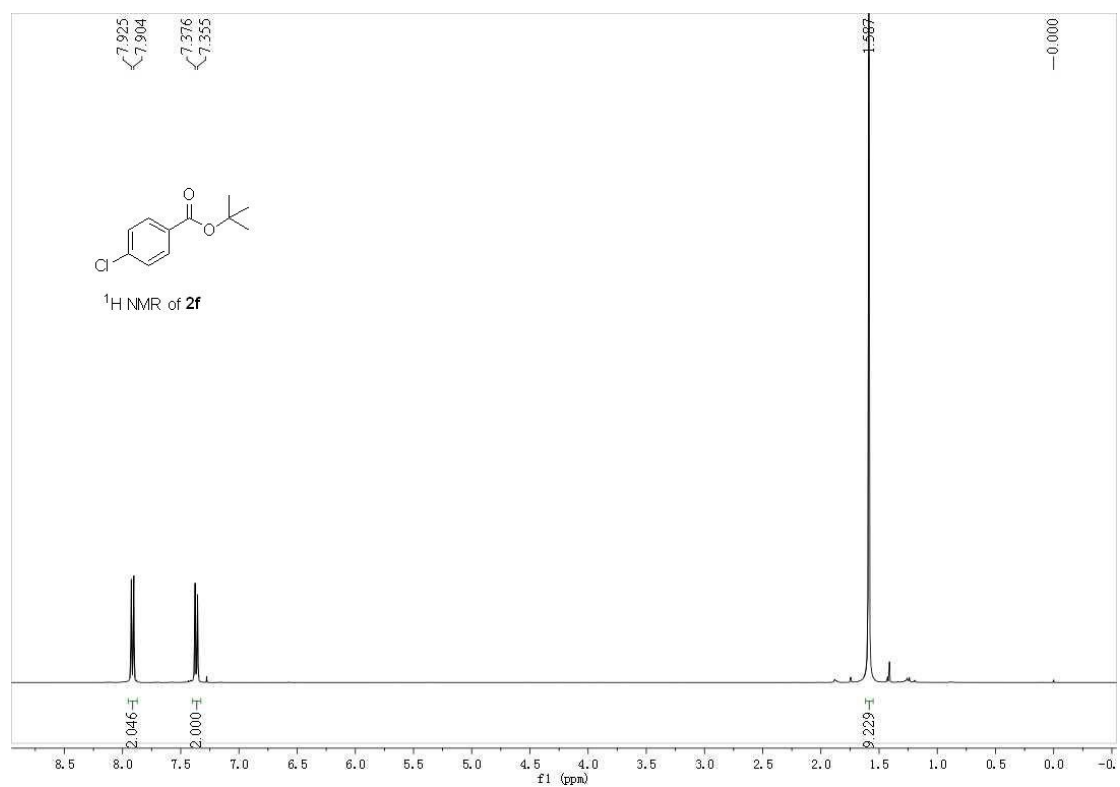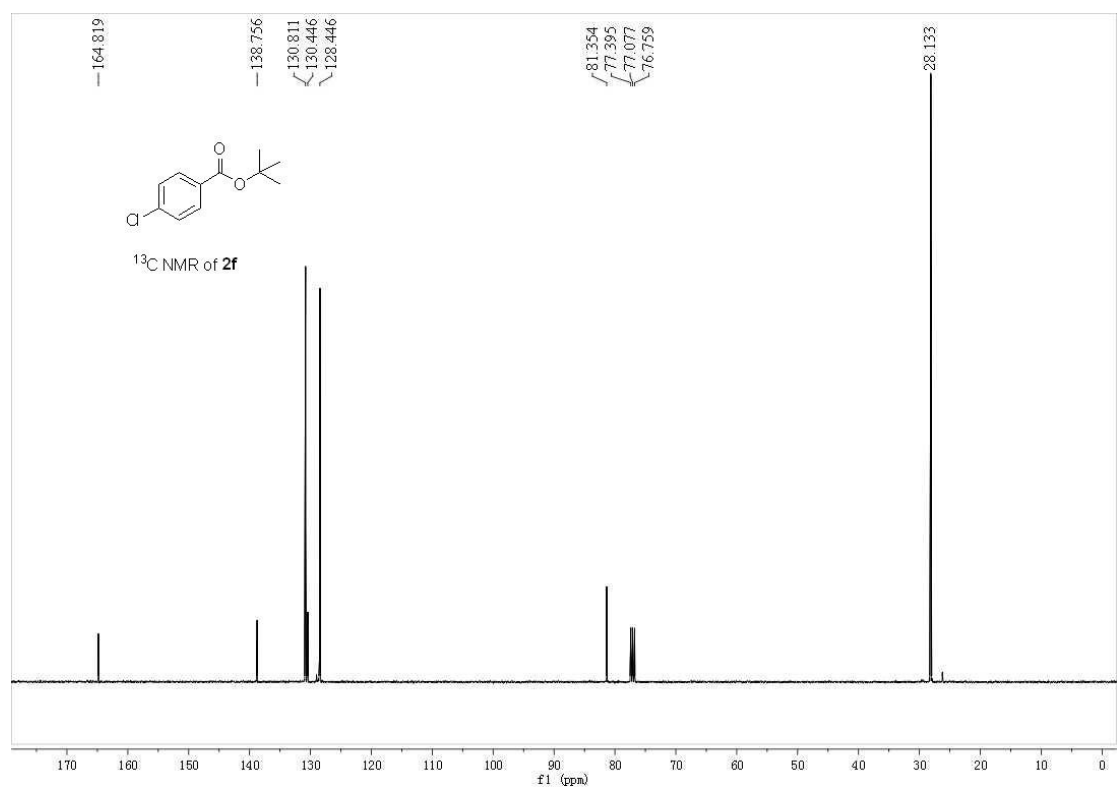

# $^1\text{H}$ NMR and $^{13}\text{C}$ NMR of **2g**

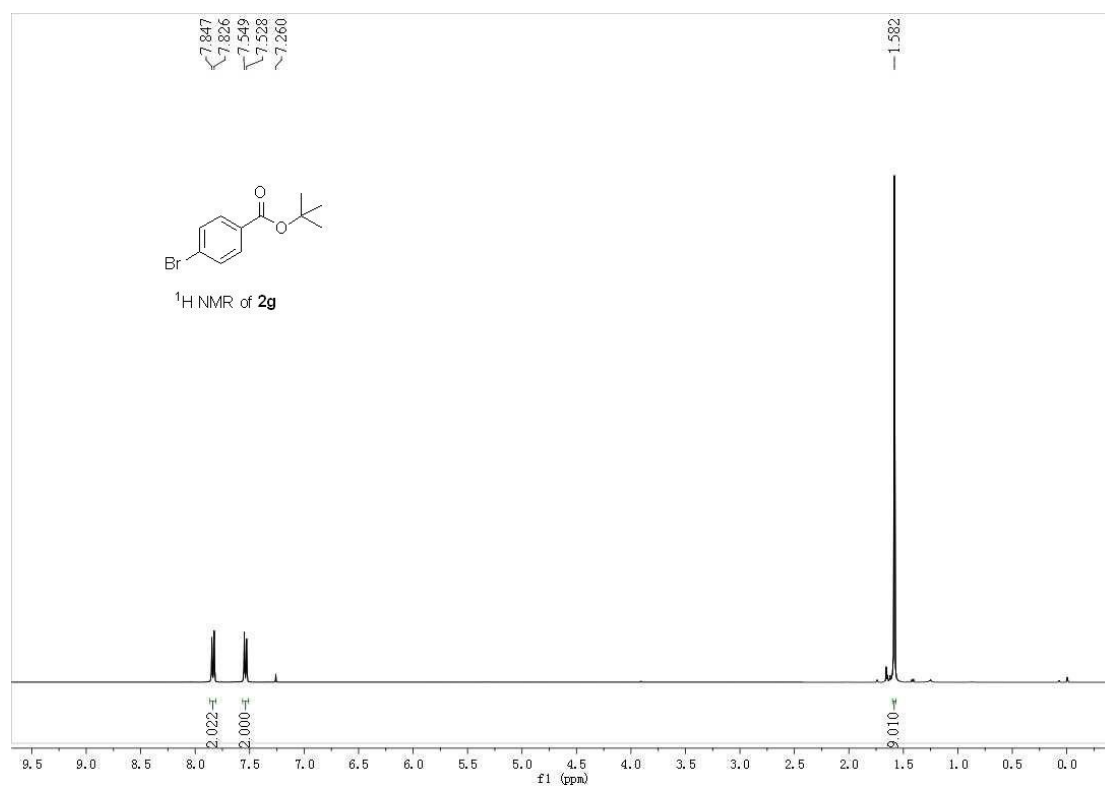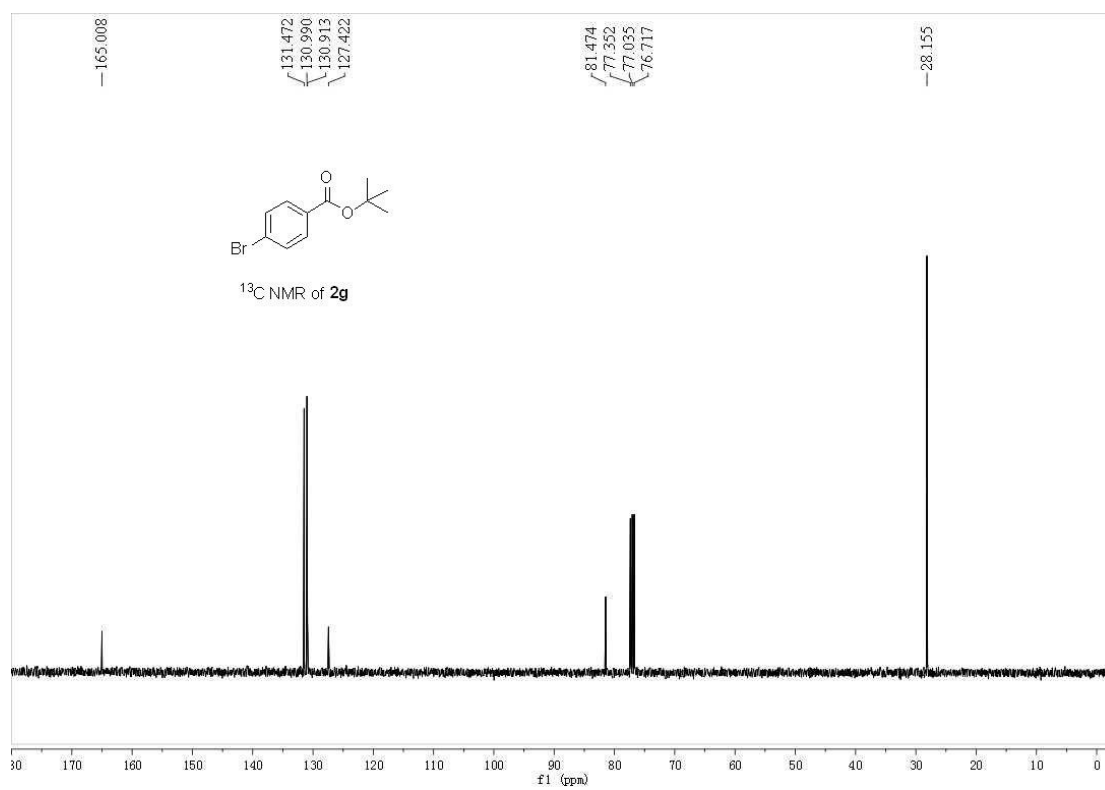

# <sup>1</sup>H NMR and <sup>13</sup>C NMR of **2h**

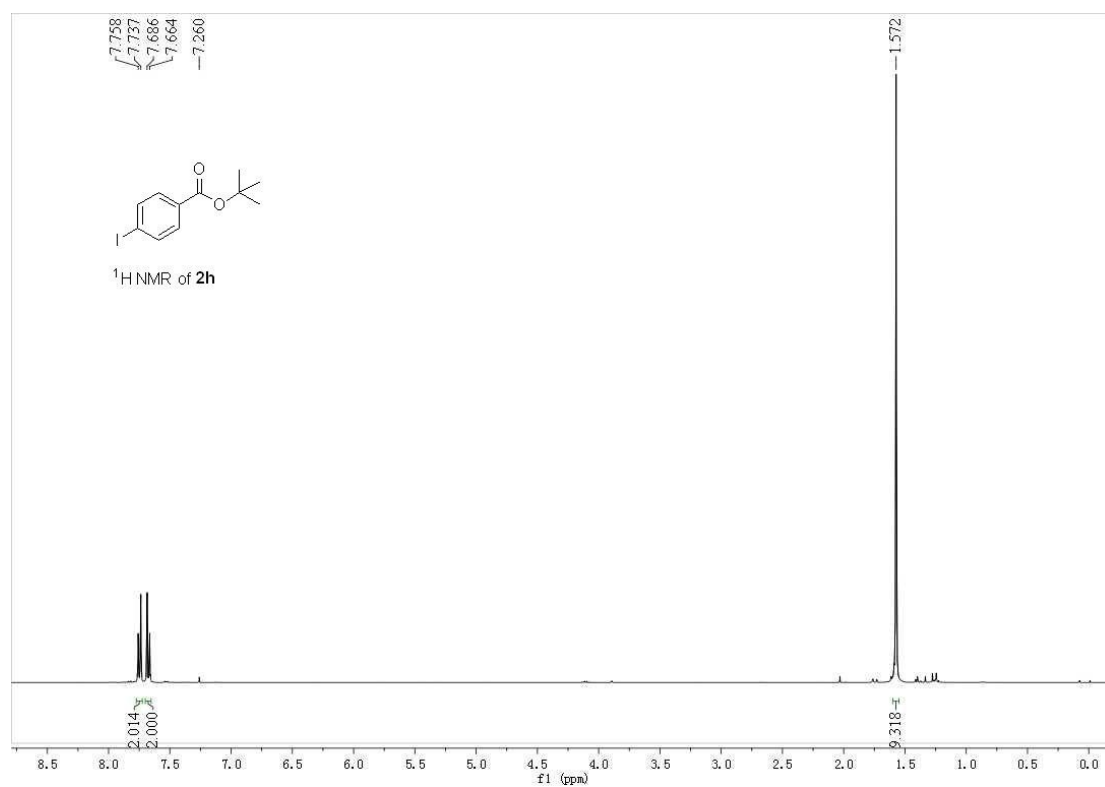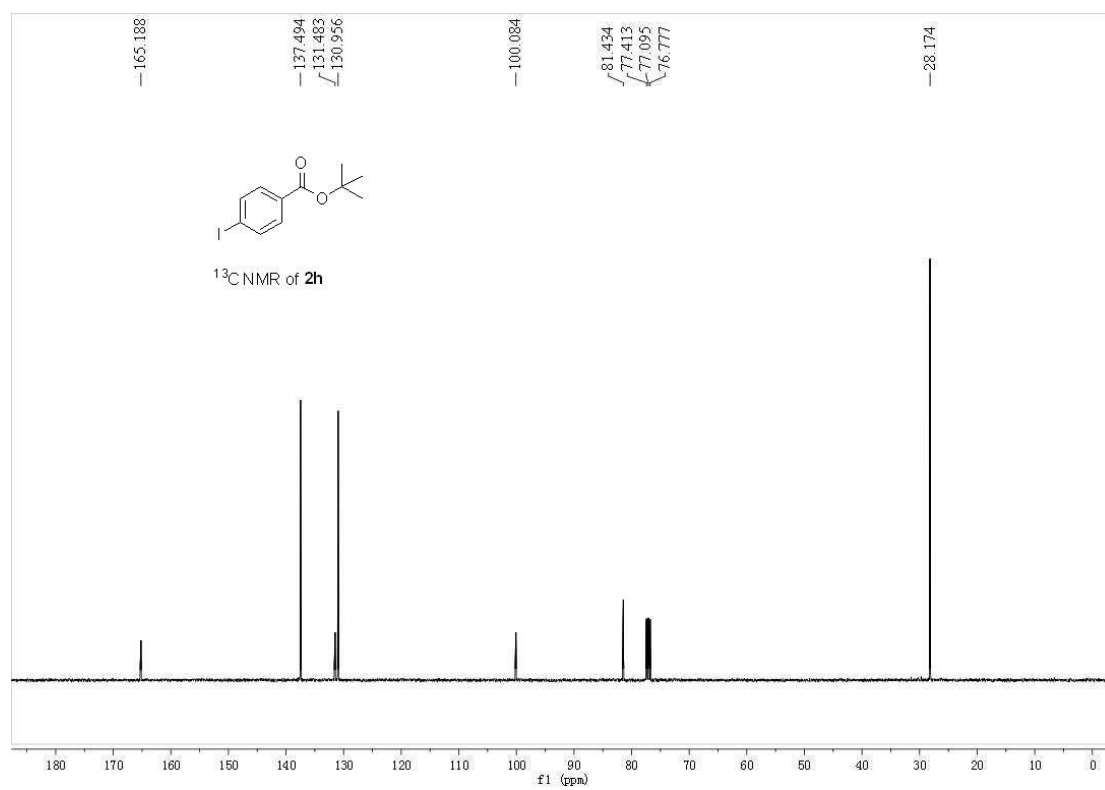

$^1\text{H}$  NMR,  $^{13}\text{C}$  NMR and  $^{19}\text{F}$  NMR of **2i**

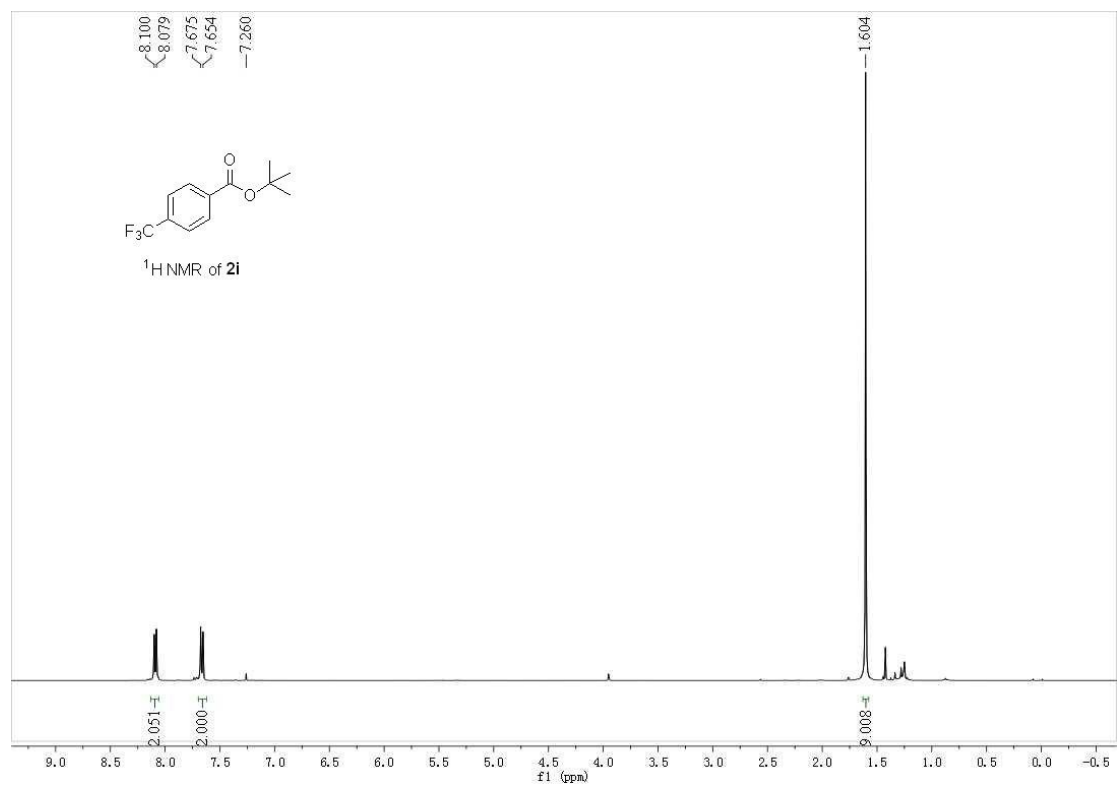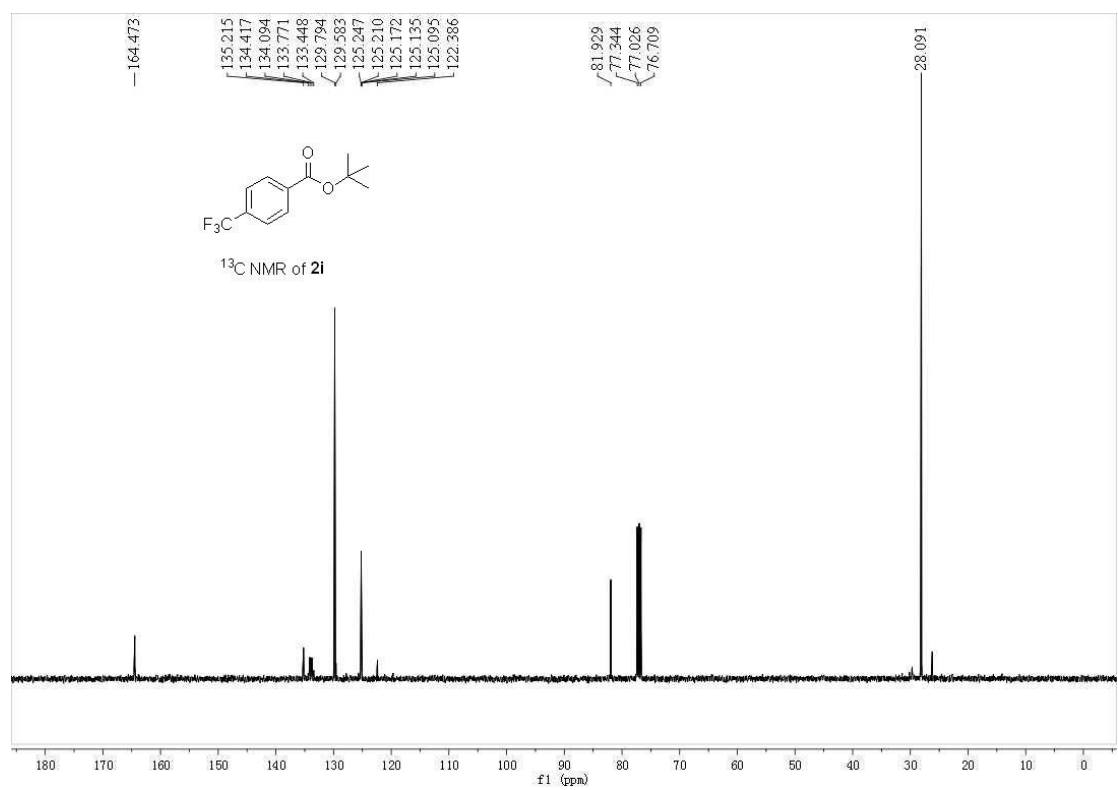



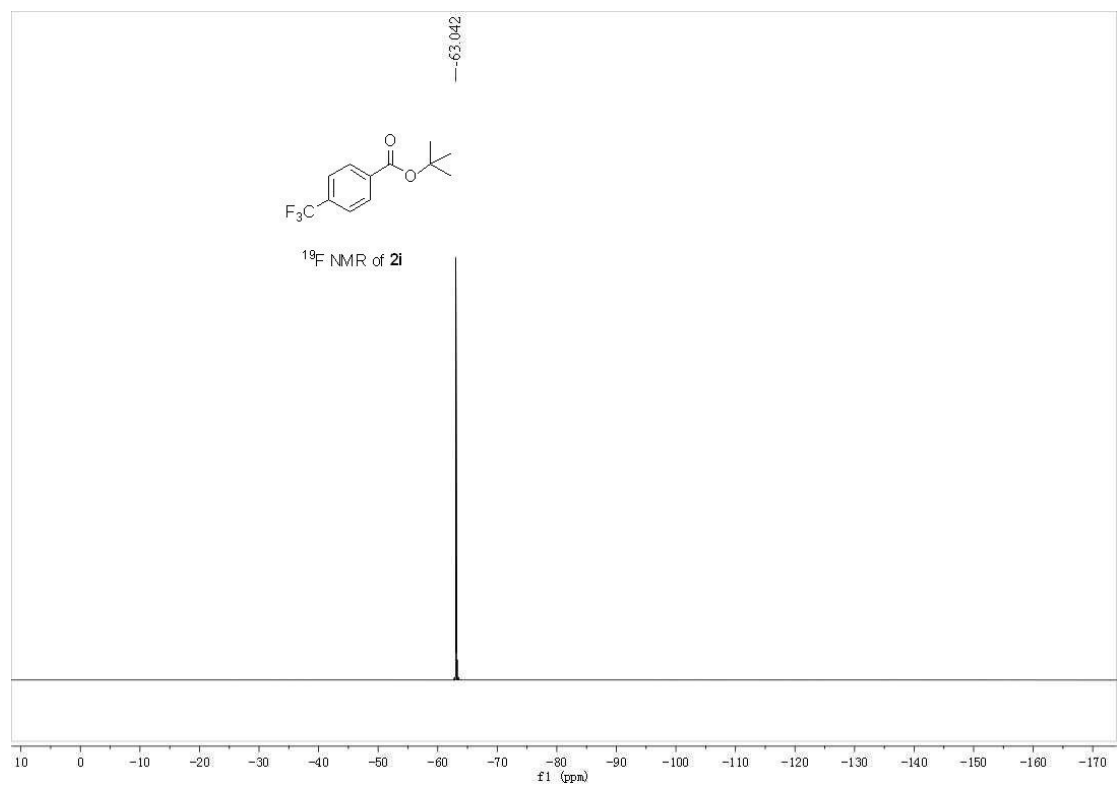

# <sup>1</sup>H NMR and <sup>13</sup>C NMR of 2j

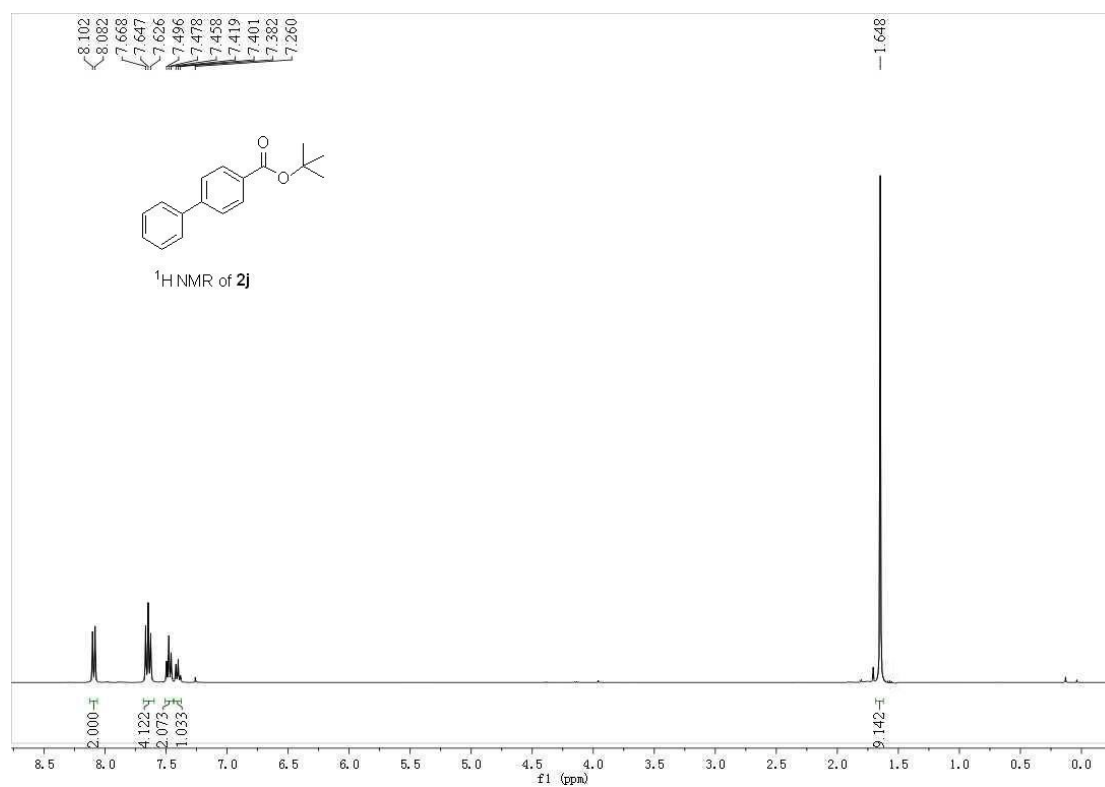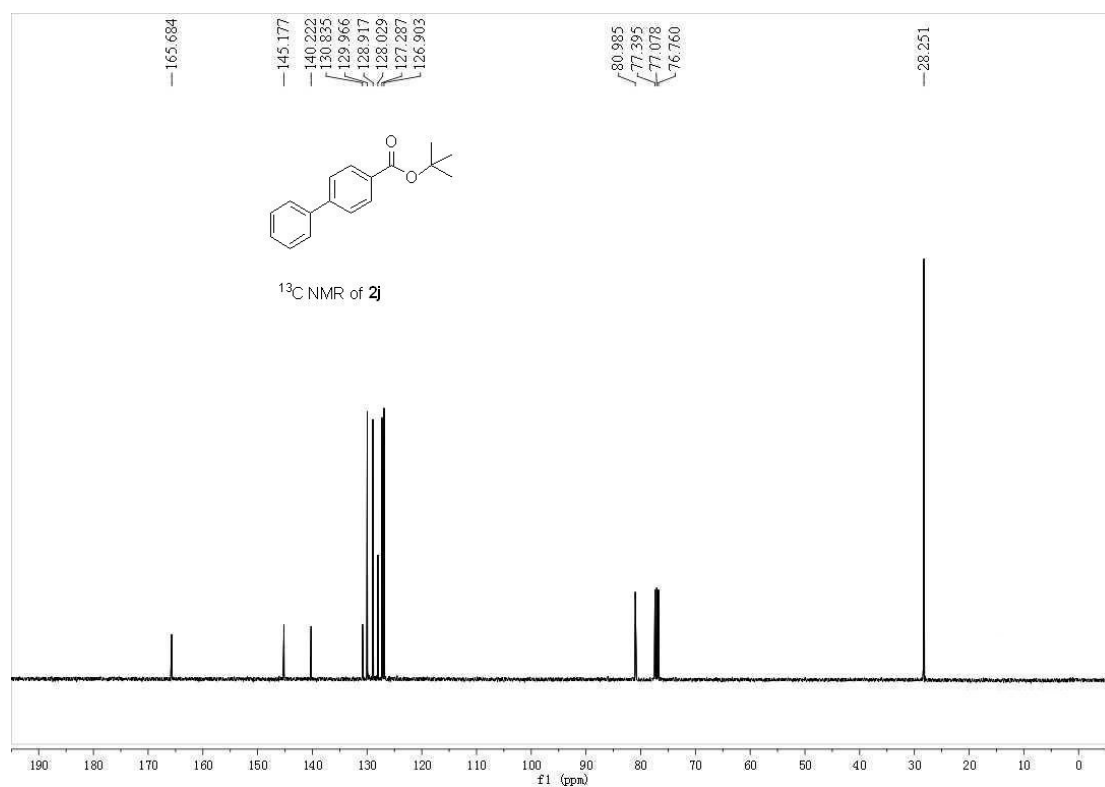

# <sup>1</sup>H NMR and <sup>13</sup>C NMR of **2k**

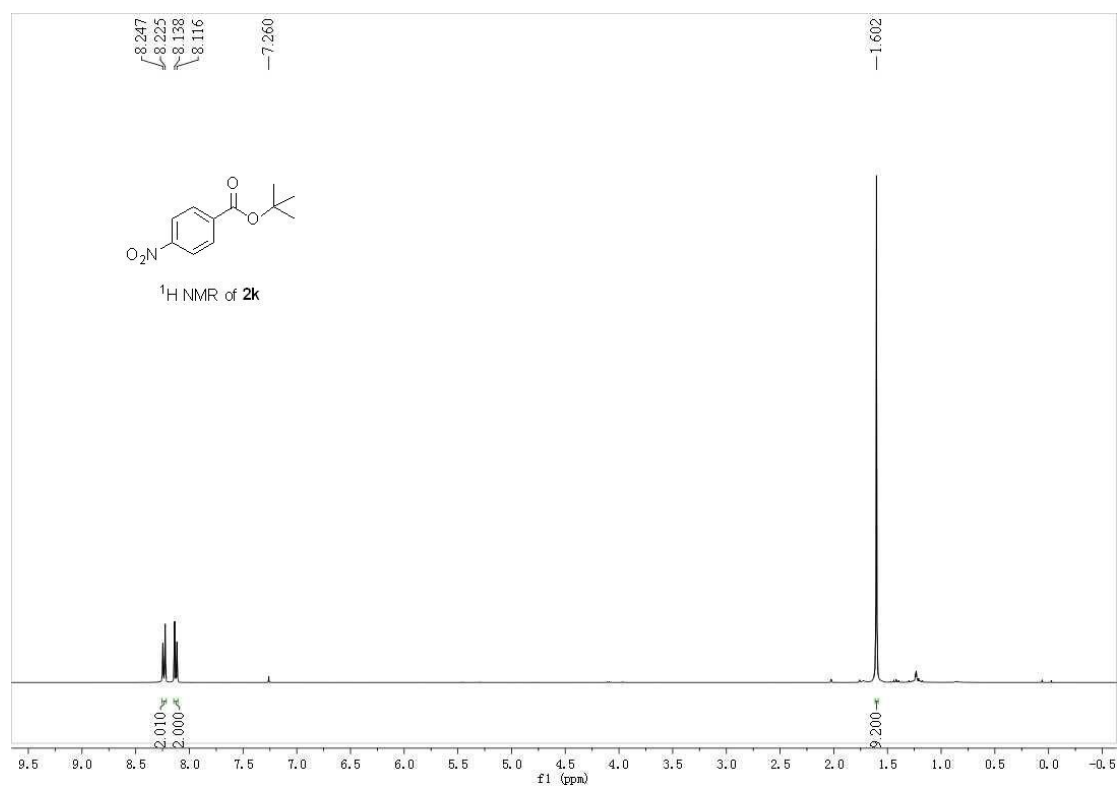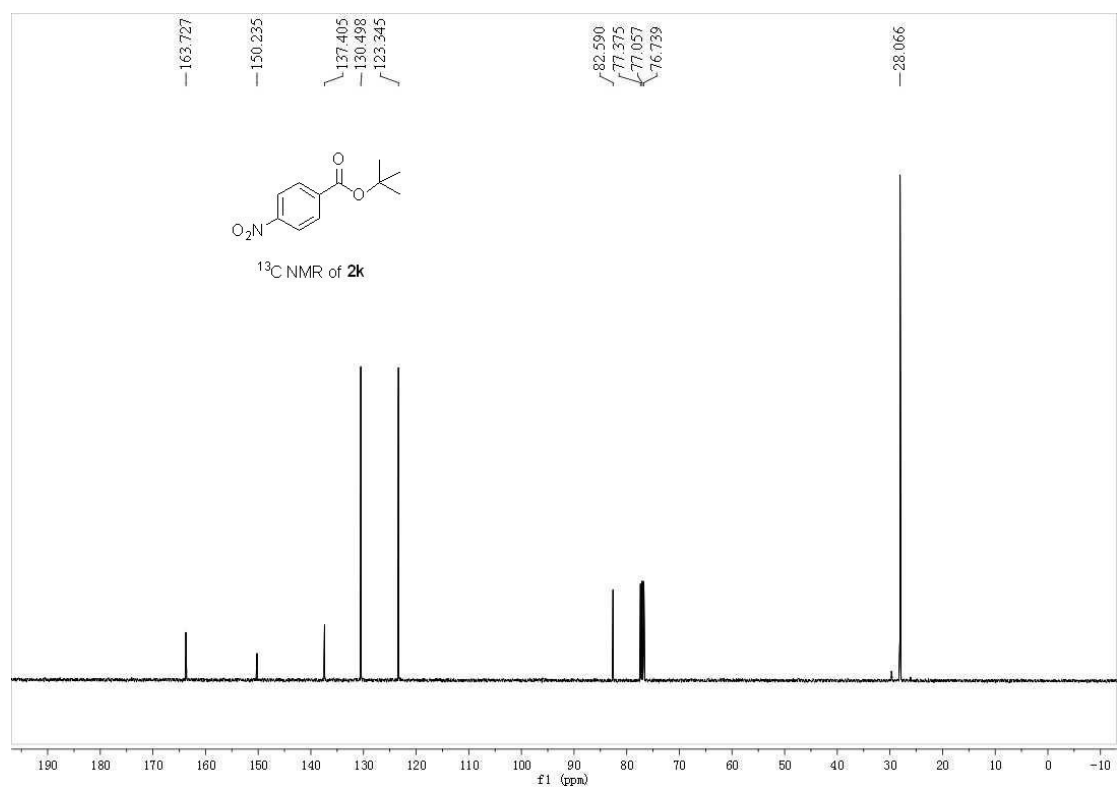

# $^1\text{H}$ NMR and $^{13}\text{C}$ NMR of **21**

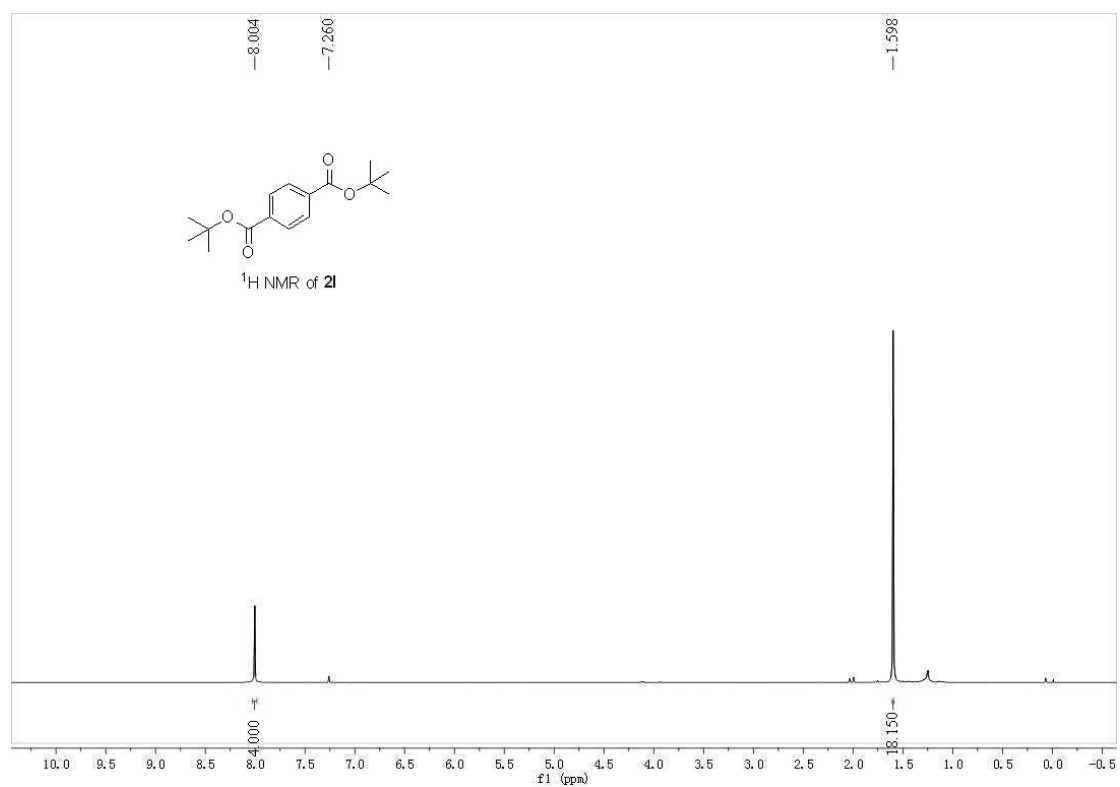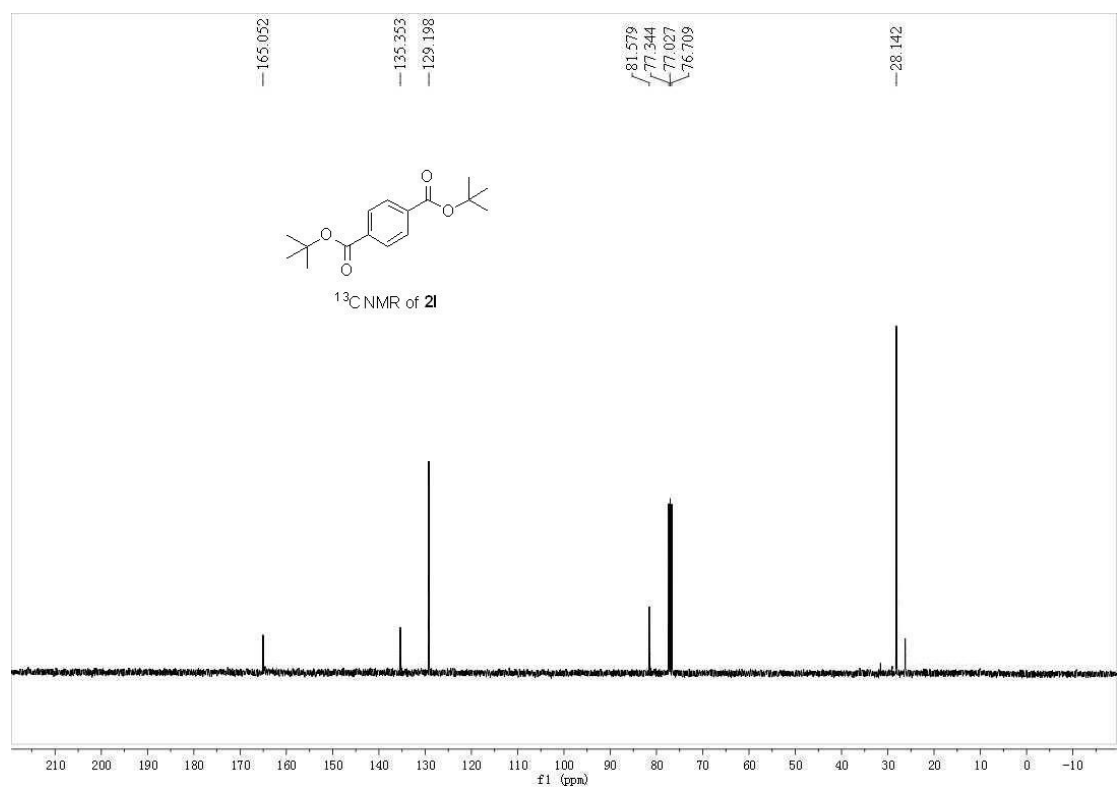

# $^1\text{H}$ NMR and $^{13}\text{C}$ NMR of **2m**

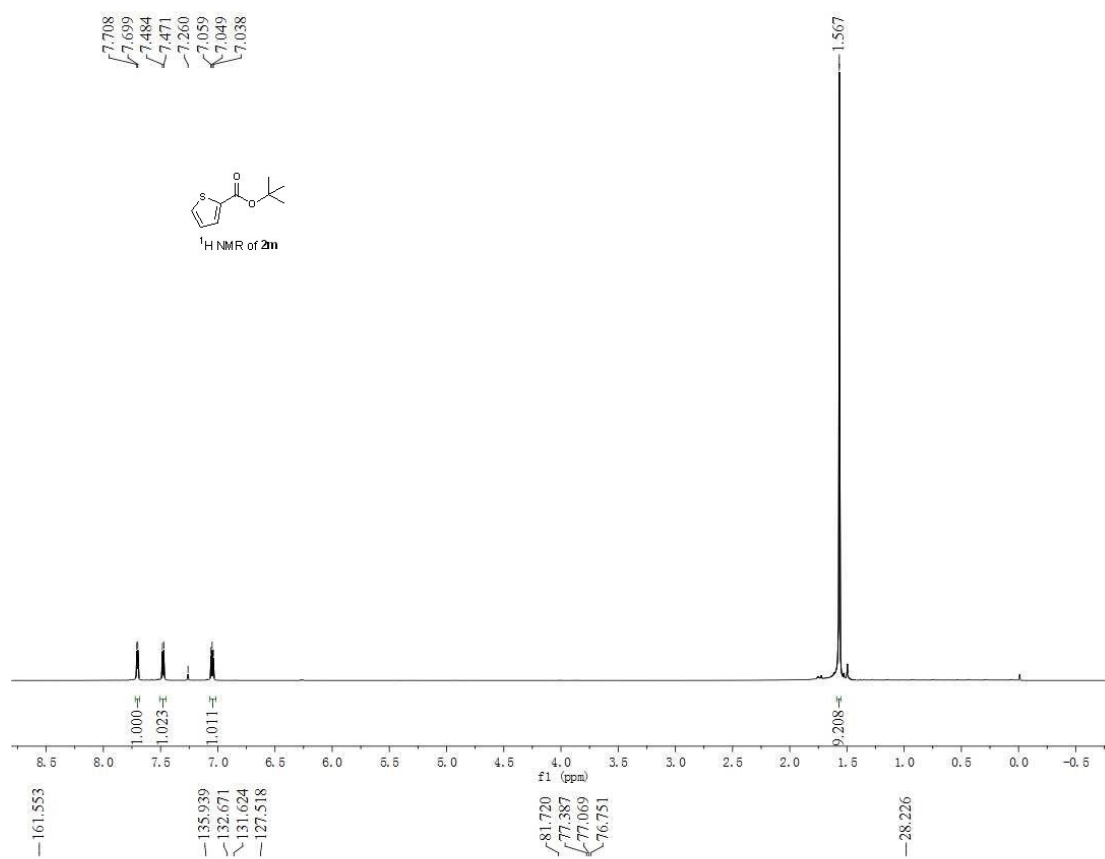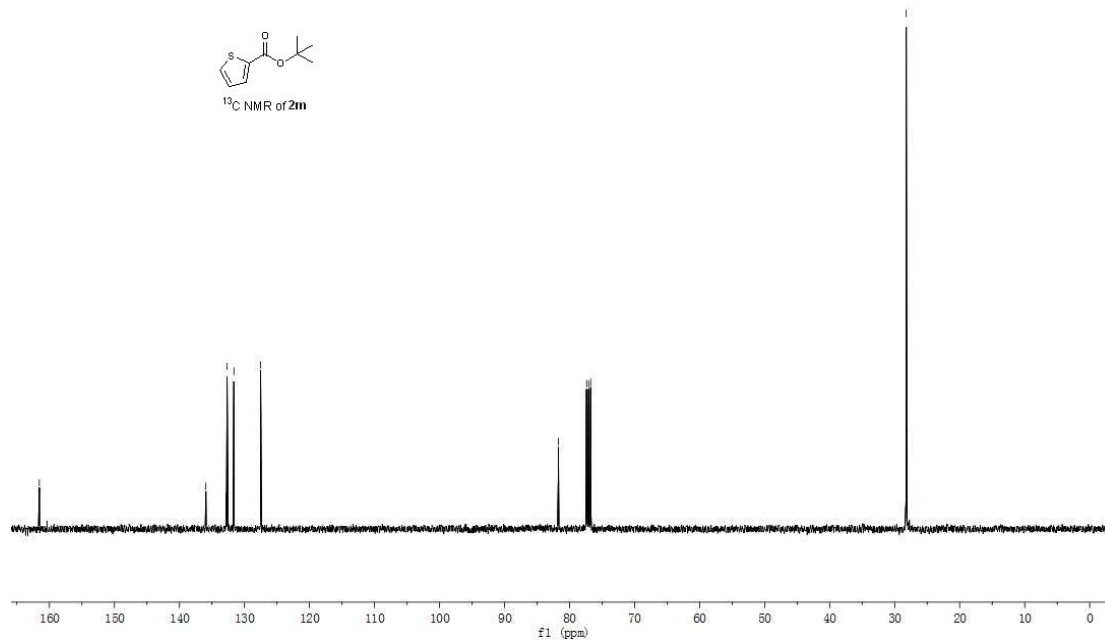

<sup>1</sup>H NMR and <sup>13</sup>C NMR of **2n**

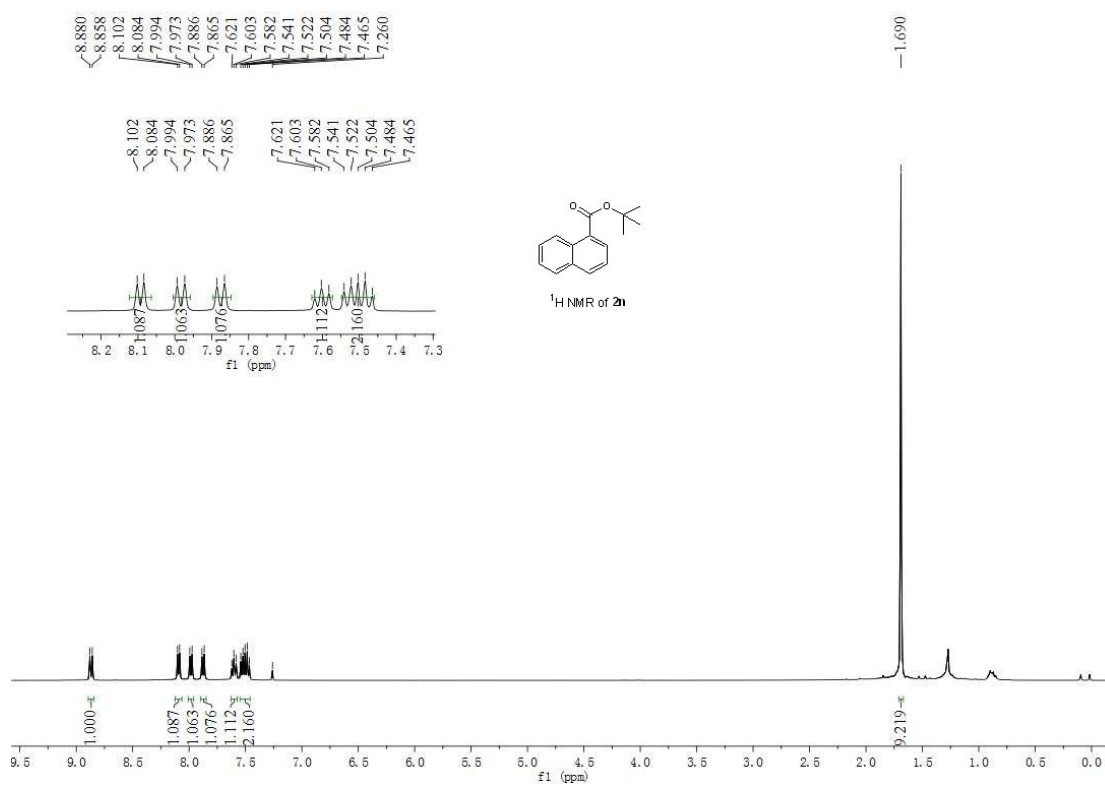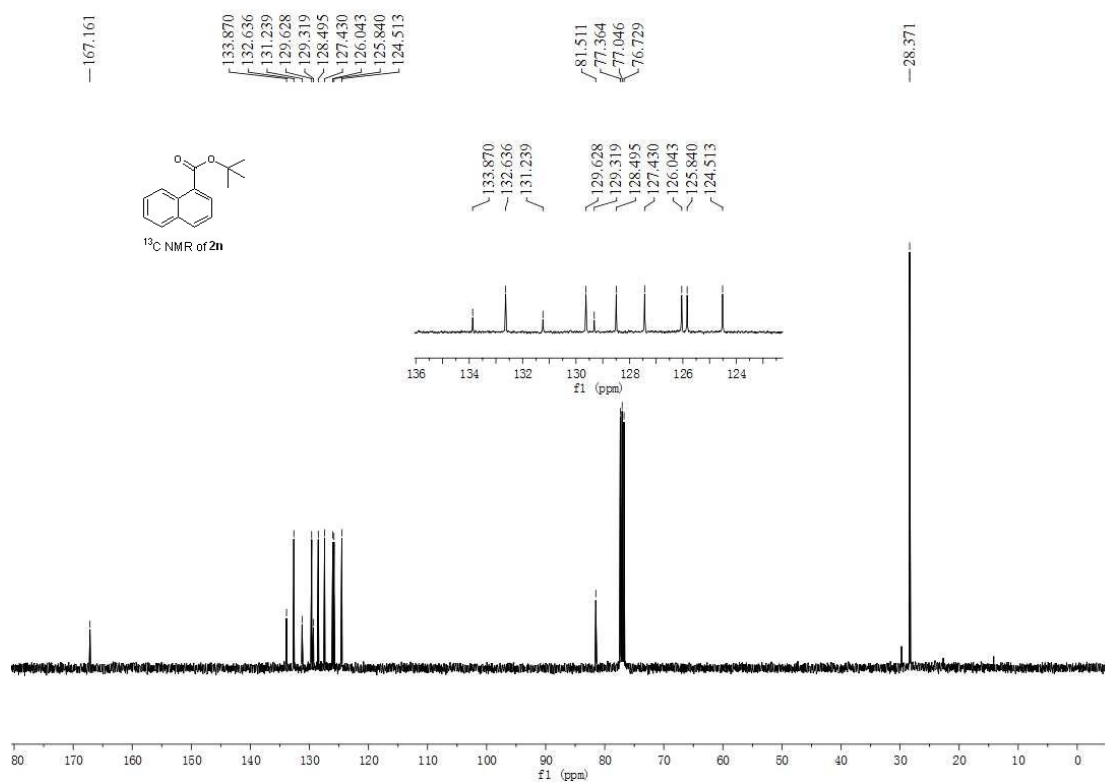

# $^1\text{H}$ NMR and $^{13}\text{C}$ NMR of **2o**

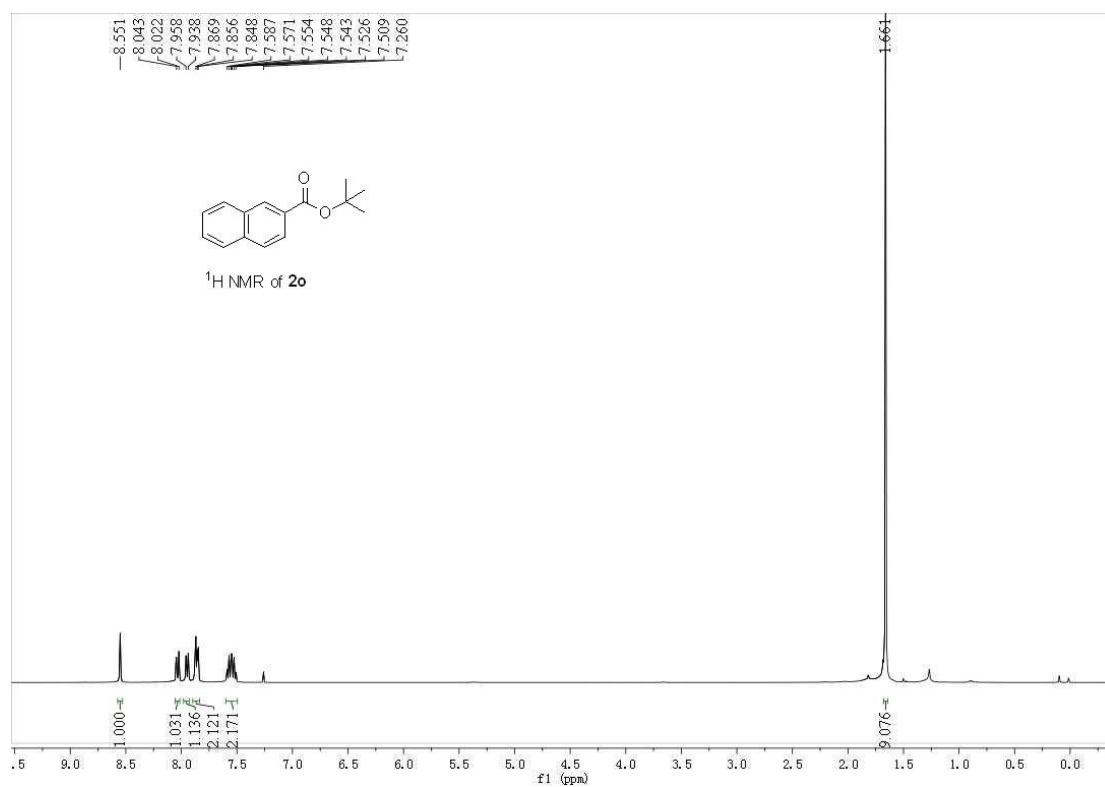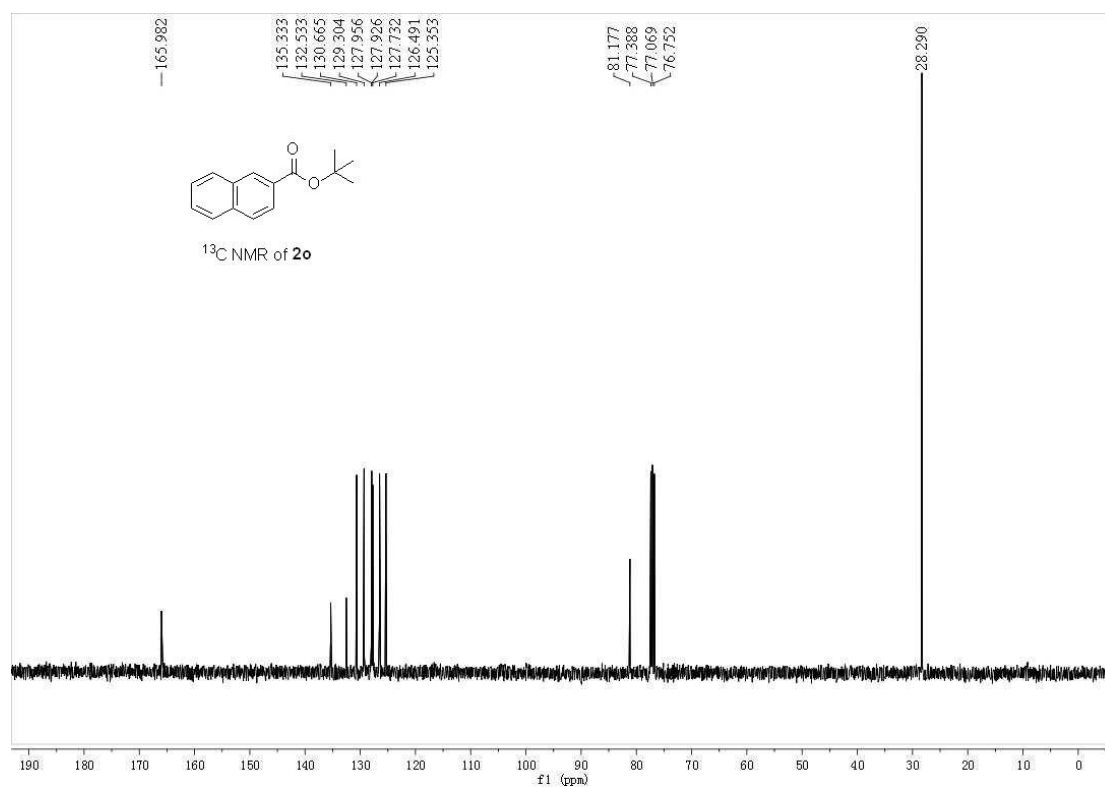

# <sup>1</sup>H NMR and <sup>13</sup>C NMR of 2p

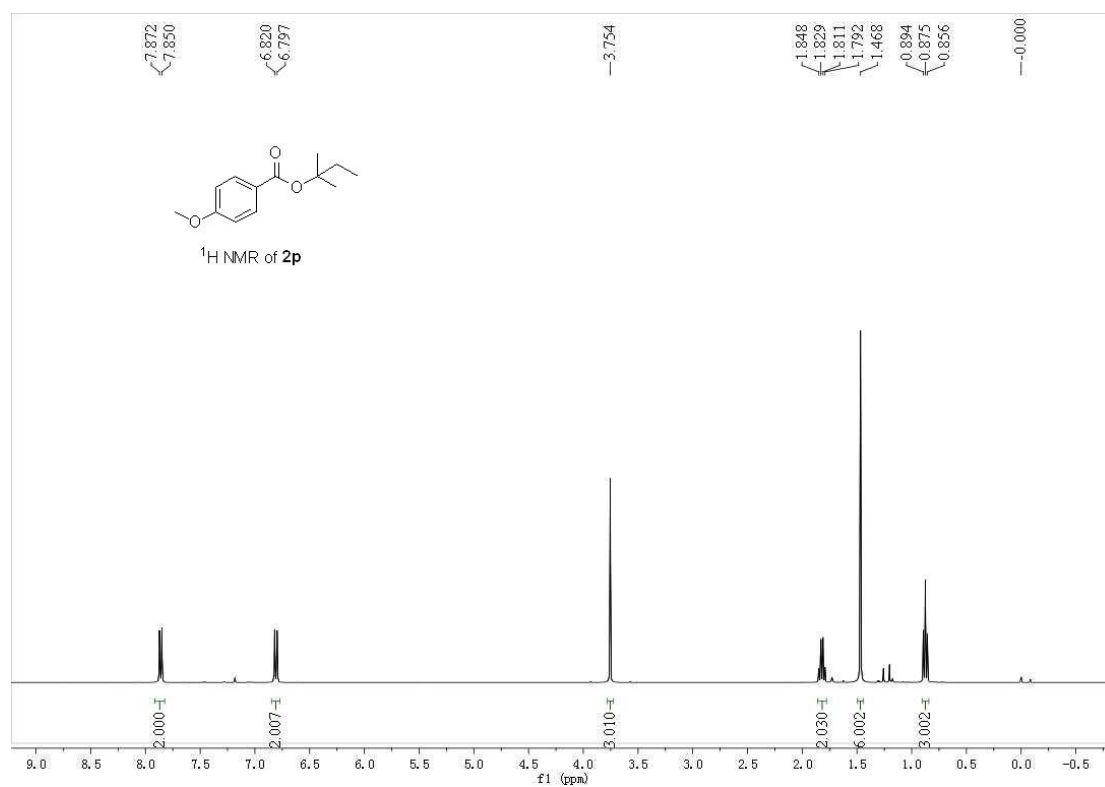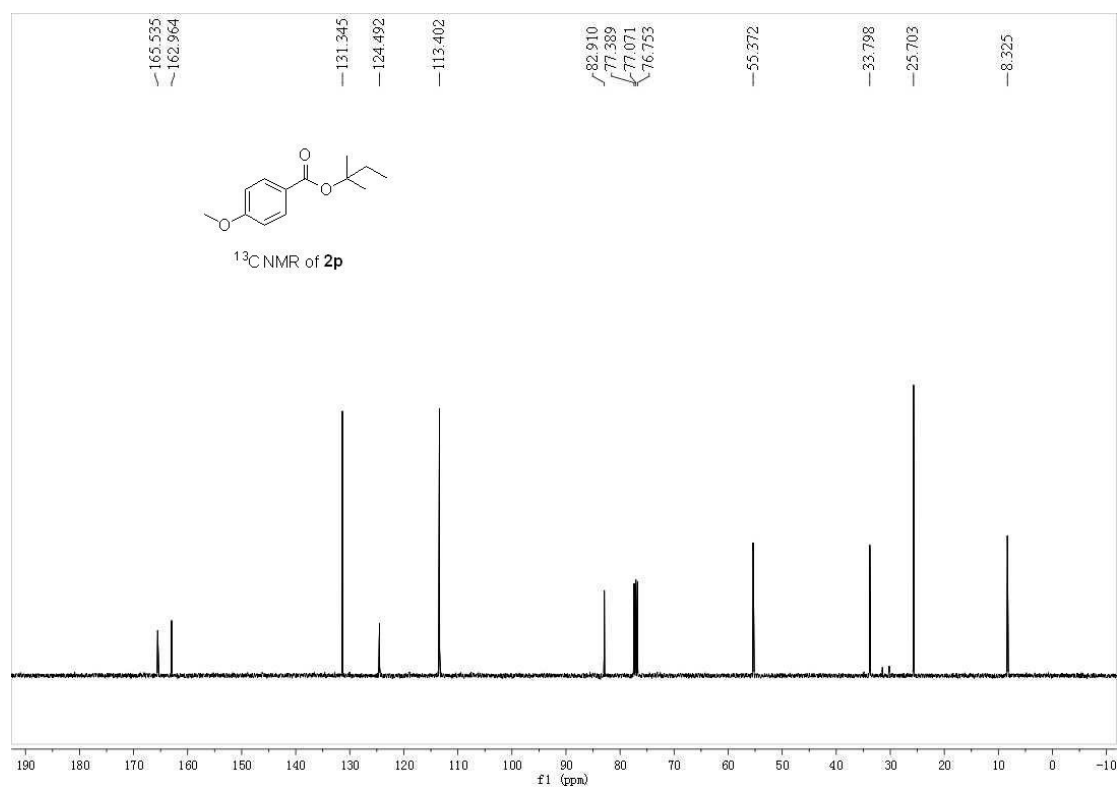



# $^1\text{H}$ NMR and $^{13}\text{C}$ NMR of **2q**

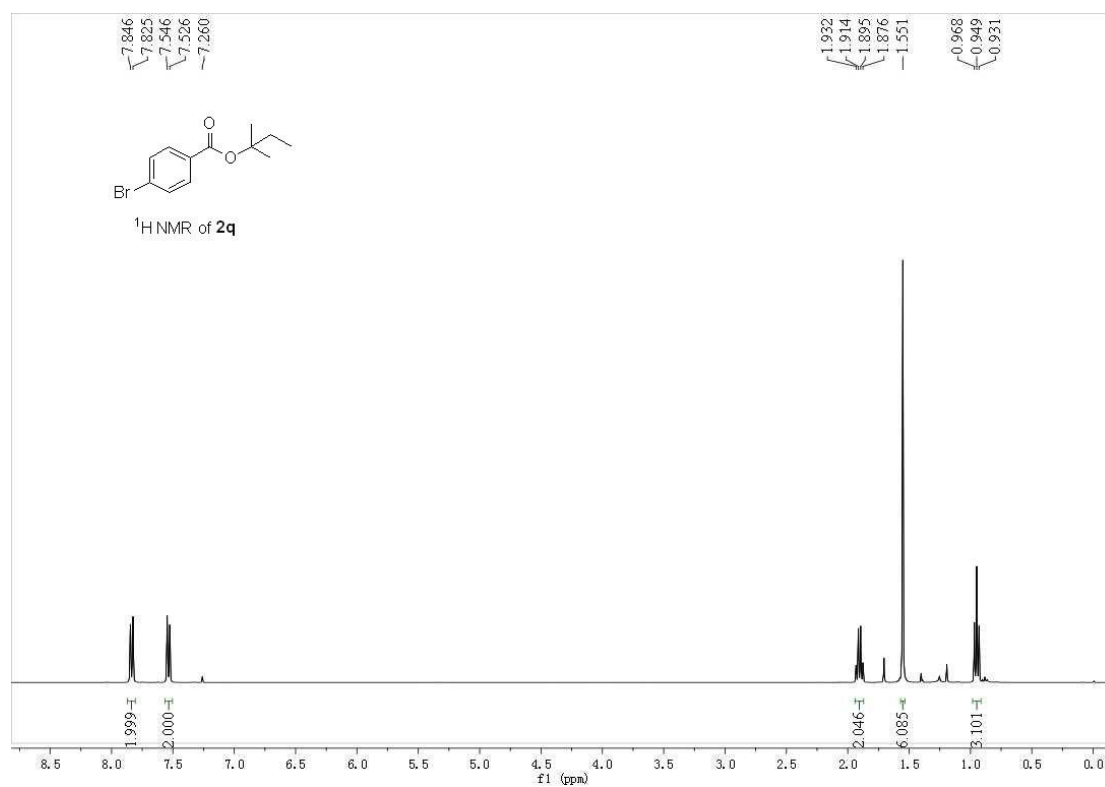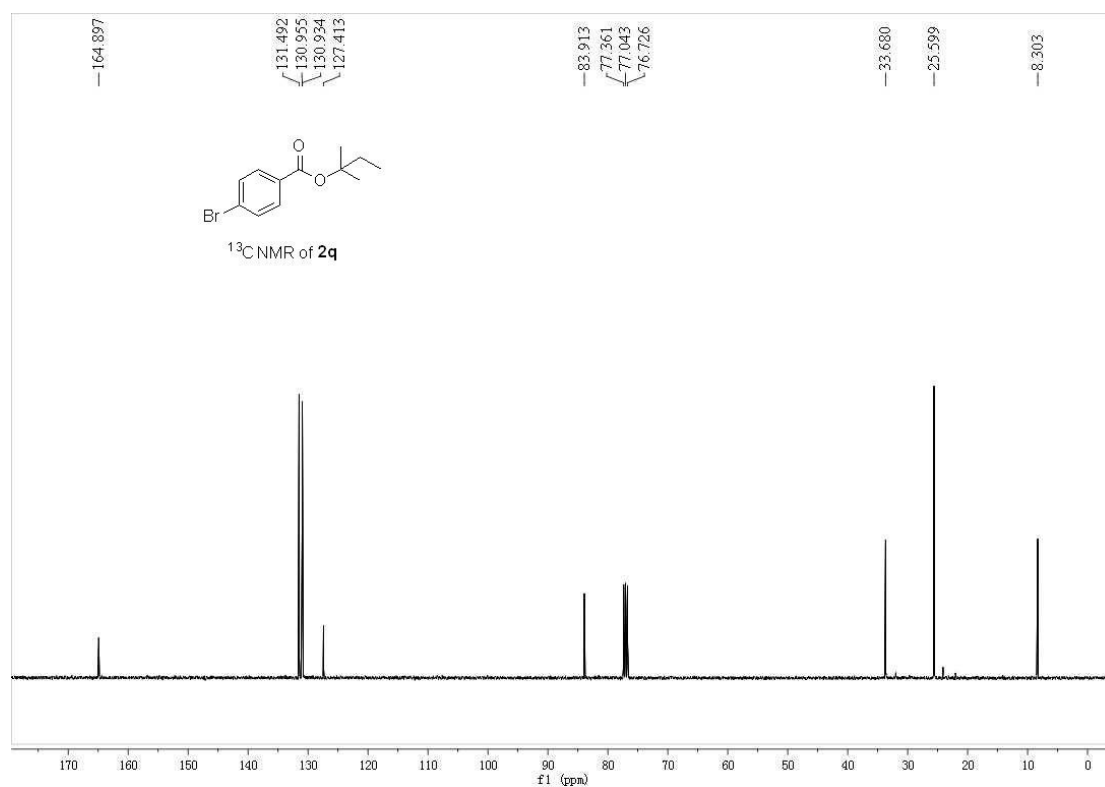

# $^1\text{H}$ NMR and $^{13}\text{C}$ NMR of **2r**

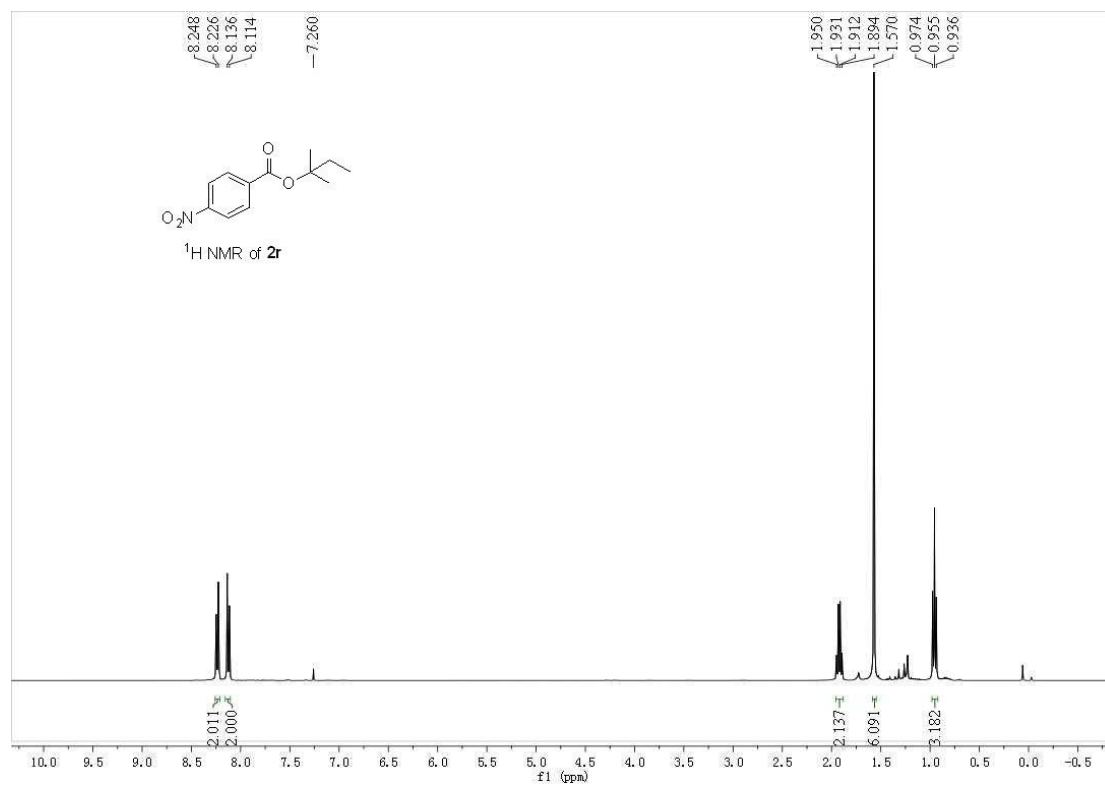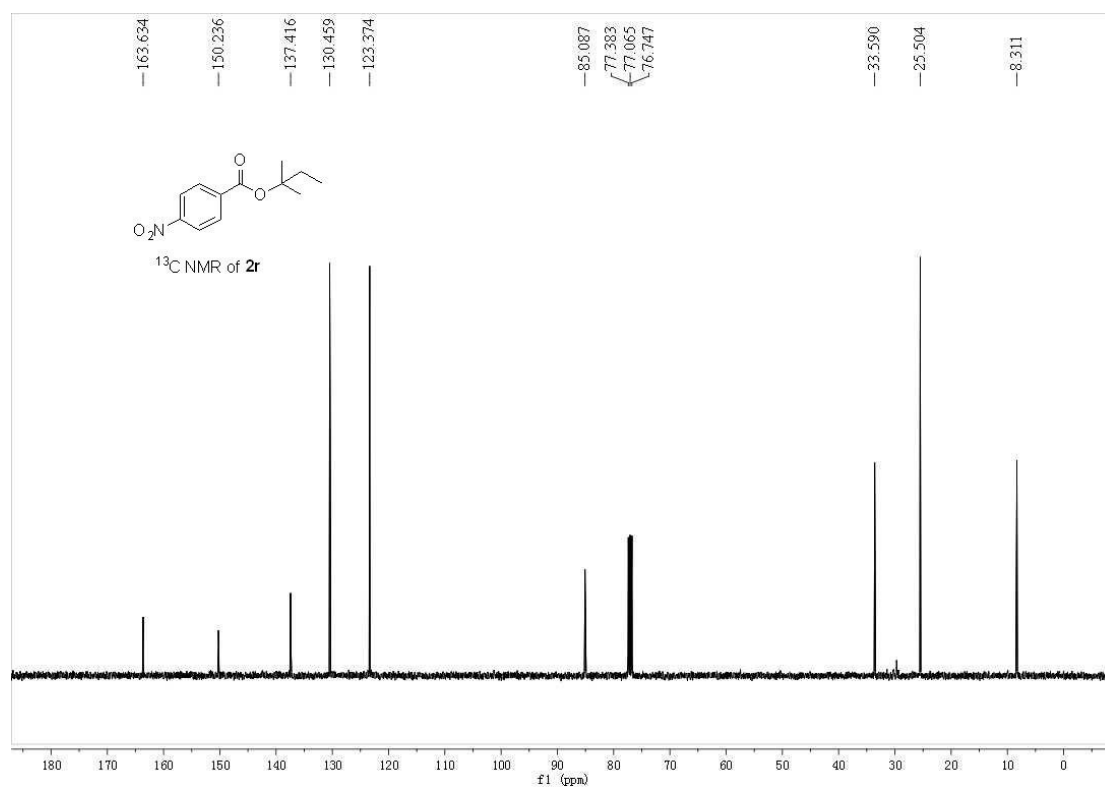

Supplement: c6ra20966a1.pdf [file c6ra20966a1.pdf]
